# Supplementary material for: Concise total syntheses of (±)-noruleine and (±)-uleine
Source: Royal Society of Chemistry journal article supplement (doi:10.1039/c3ob40180d), 2013-01-01
Supplement: c3ob40180d.pdf [file c3ob40180d.pdf]

## Electronic Supplementary Information for

### Concise Total Syntheses of (±)-Noruleine and (±)-Uleine

Süleyman Patir<sup>\*,a</sup> and Erkan Ertürk<sup>\*,b</sup>

<sup>a</sup> Department of Chemistry Education, Faculty of Education, Hacettepe University, 06800 Beytepe, Ankara, Turkey

<sup>b</sup> Chemistry Institute, TUBITAK Marmara Research Center, 41470 Gebze, Kocaeli, Turkey

E-mail: [patir@hacettepe.edu.tr](mailto:patir@hacettepe.edu.tr) (S. Patir); [erkan.erturk@tubitak.gov.tr](mailto:erkan.erturk@tubitak.gov.tr) (E. Ertürk)

#### Table of Contents

| Page(s) | Content                                               |
|---------|-------------------------------------------------------|
| S2      | <sup>1</sup> H NMR Spectrum of (±)- <b>9</b>          |
| S3      | <sup>13</sup> C NMR Spectrum of (±)- <b>9</b>         |
| S4      | <sup>1</sup> H NMR Spectrum of (±)- <b>10</b>         |
| S5      | <sup>13</sup> C NMR Spectrum of (±)- <b>10</b>        |
| S6      | <sup>1</sup> H NMR Spectrum of (±)- <b>11</b>         |
| S7      | <sup>13</sup> C NMR Spectrum of (±)- <b>11</b>        |
| S8      | <sup>1</sup> H NMR Spectrum of (±)- <b>12</b>         |
| S9      | <sup>13</sup> C NMR Spectrum of (±)- <b>12</b>        |
| S10     | <sup>1</sup> H NMR Spectrum of (±)- <b>13</b>         |
| S11     | <sup>13</sup> C NMR Spectrum of (±)- <b>13</b>        |
| S12     | <sup>1</sup> H NMR Spectrum of (±)- <b>14</b>         |
| S13     | <sup>13</sup> C NMR Spectrum of (±)- <b>14</b>        |
| S14     | <sup>1</sup> H NMR Spectrum of (±)- <b>15</b>         |
| S15     | <sup>13</sup> C NMR Spectrum of (±)- <b>15</b>        |
| S16     | <sup>1</sup> H NMR Spectrum of (±)- <b>Noruleine</b>  |
| S17     | <sup>13</sup> C NMR Spectrum of (±)- <b>Noruleine</b> |
| S18     | HRMS Spectrum of (±)- <b>Noruleine</b>                |
| S19     | <sup>1</sup> H NMR Spectrum of (±)- <b>Uleine</b>     |
| S20     | <sup>13</sup> C NMR Spectrum of (±)- <b>Uleine</b>    |
| S21     | HRMS Spectrum of (±)- <b>Uleine</b>                   |

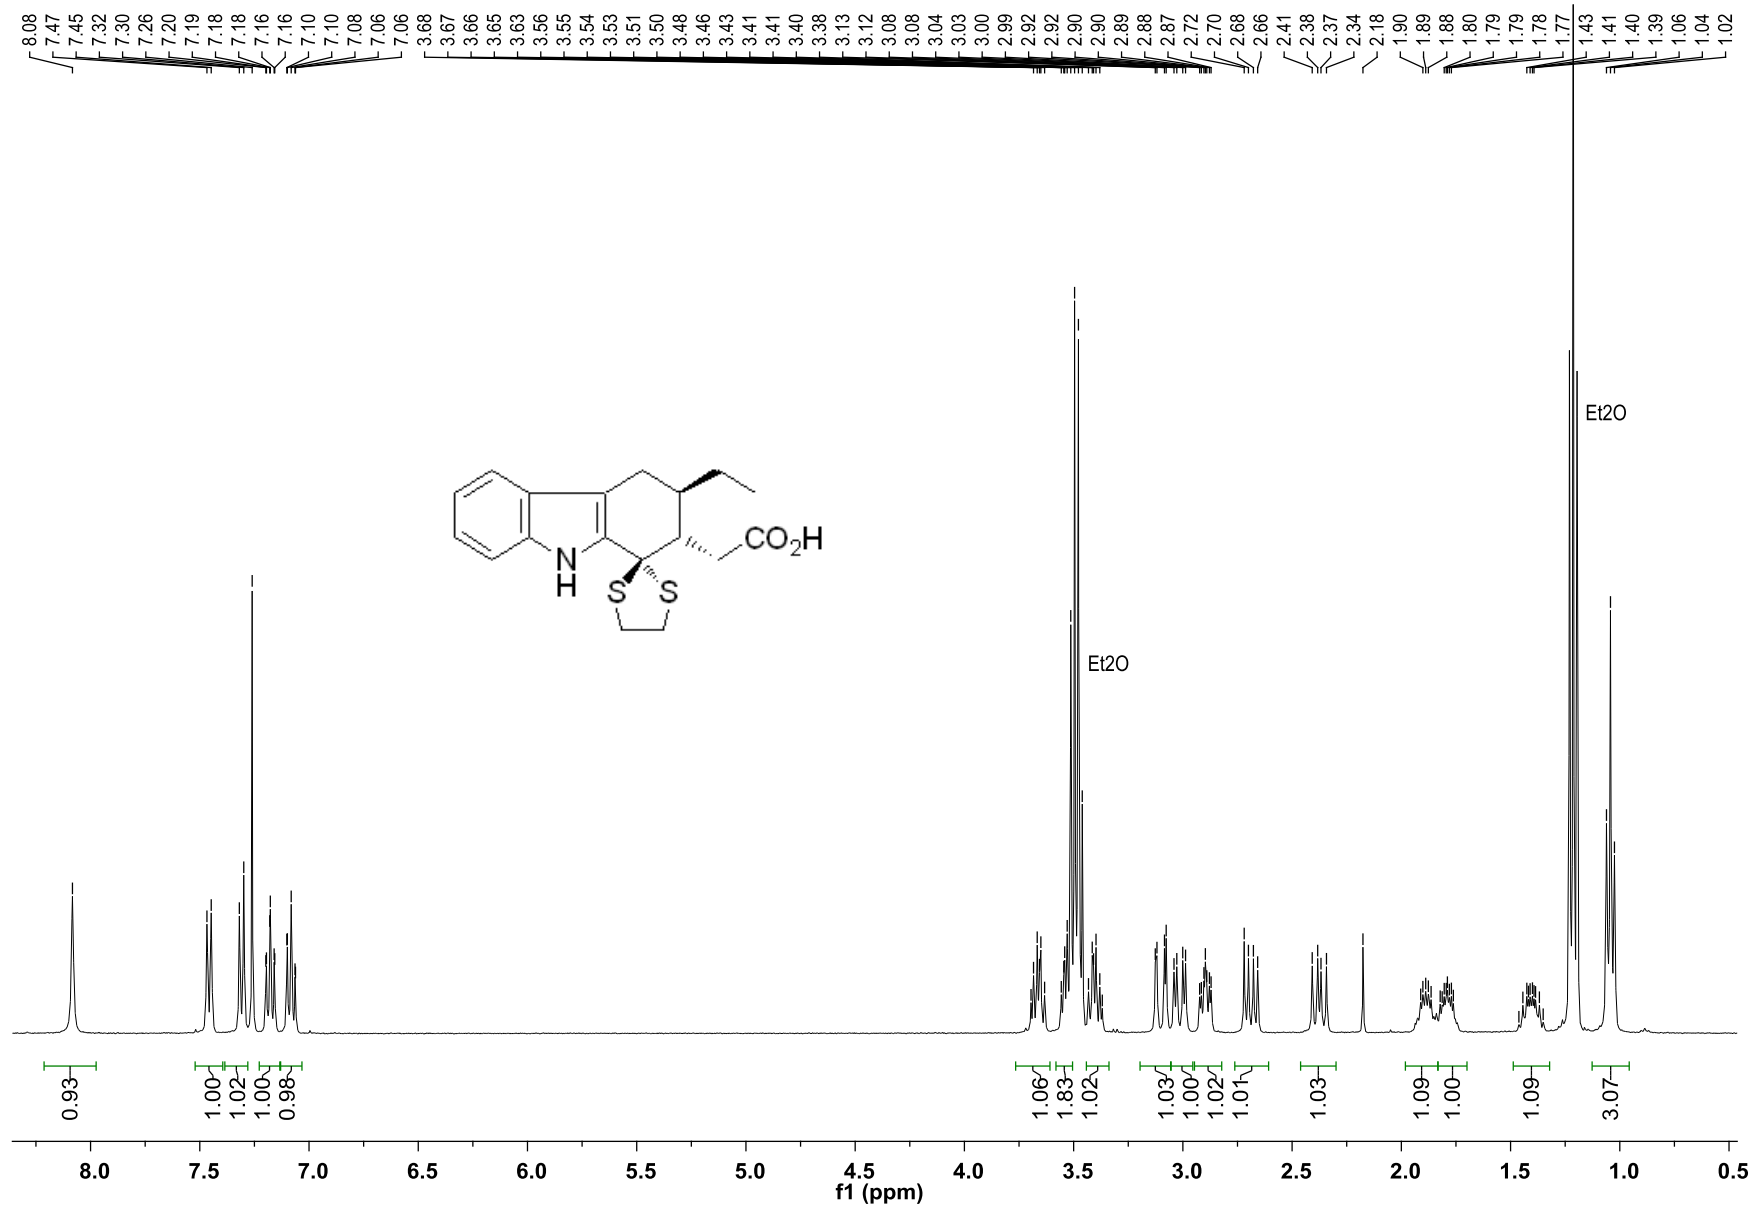

<sup>1</sup>H NMR Spectrum of (±)-9 (500 MHz, CDCl<sub>3</sub>)

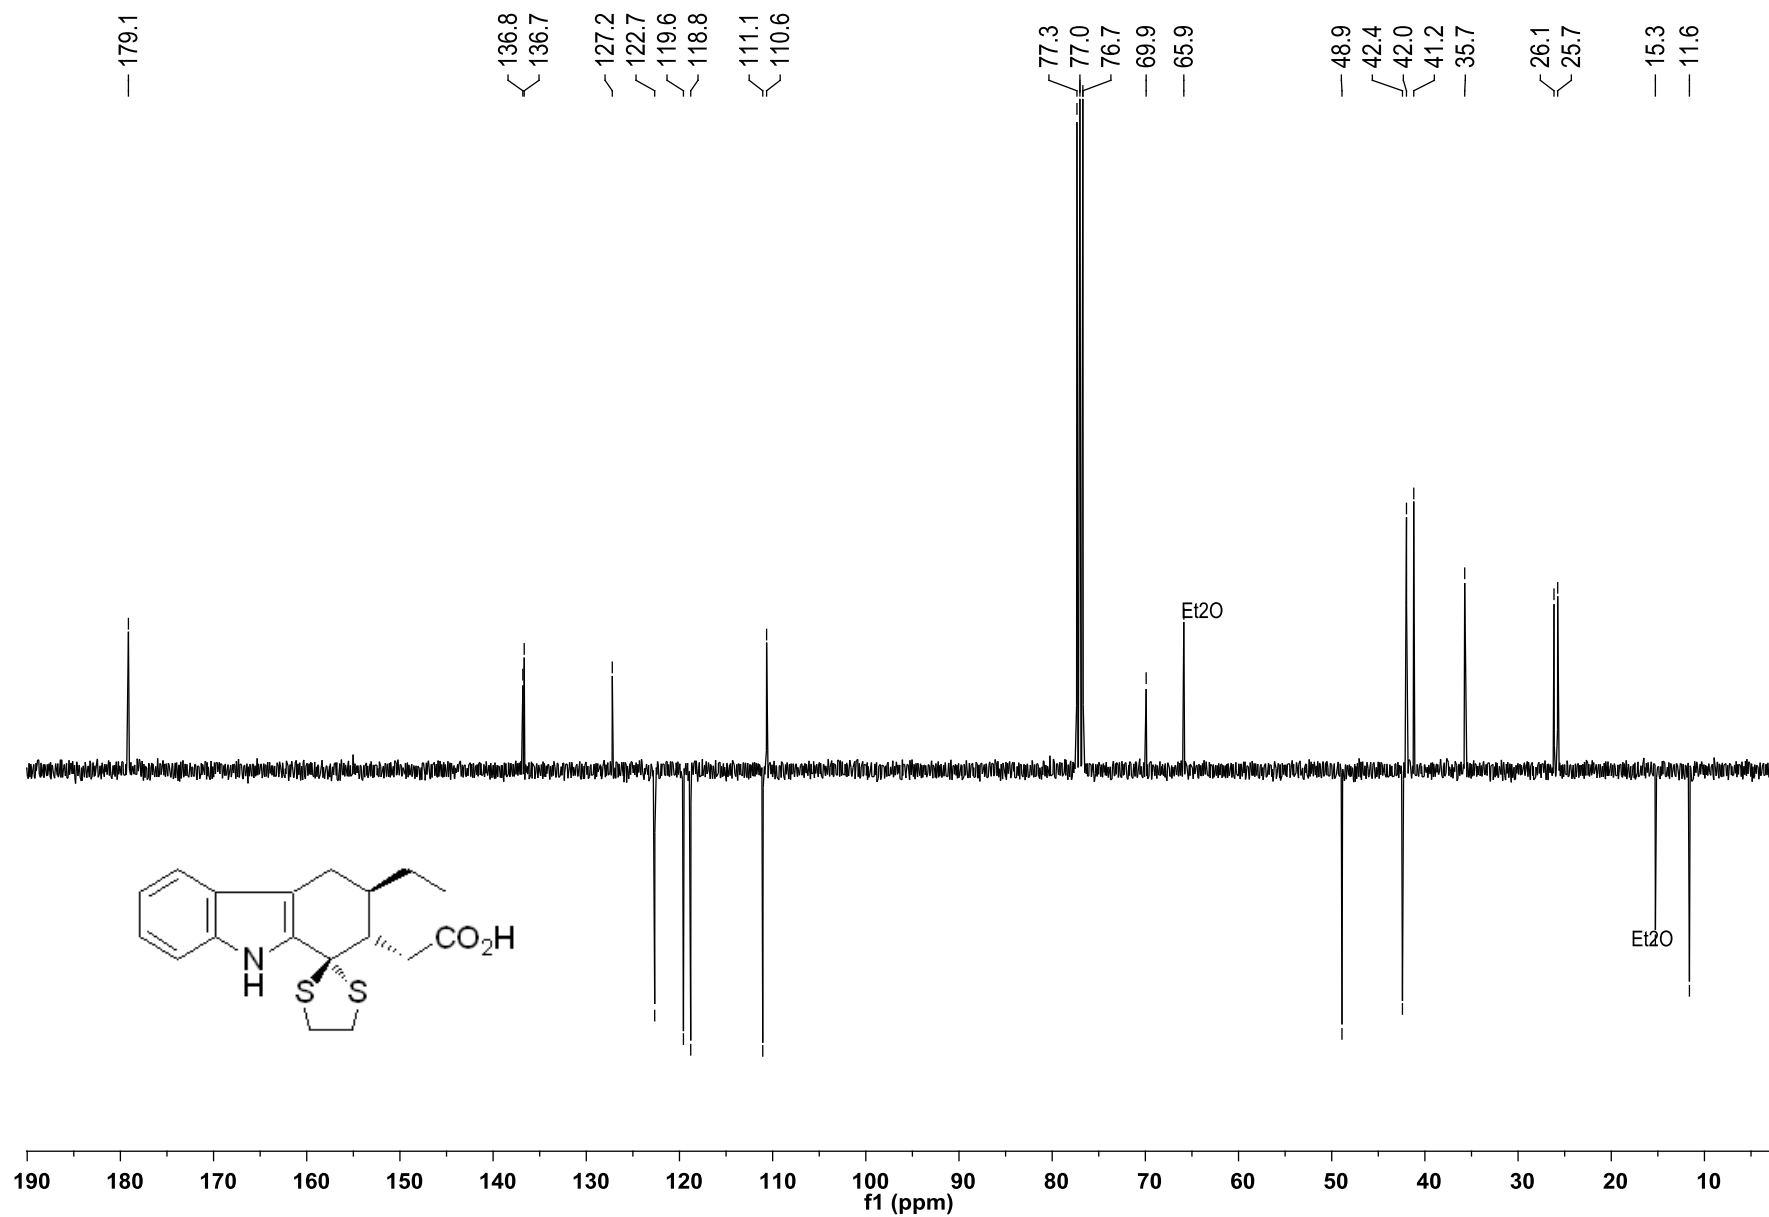

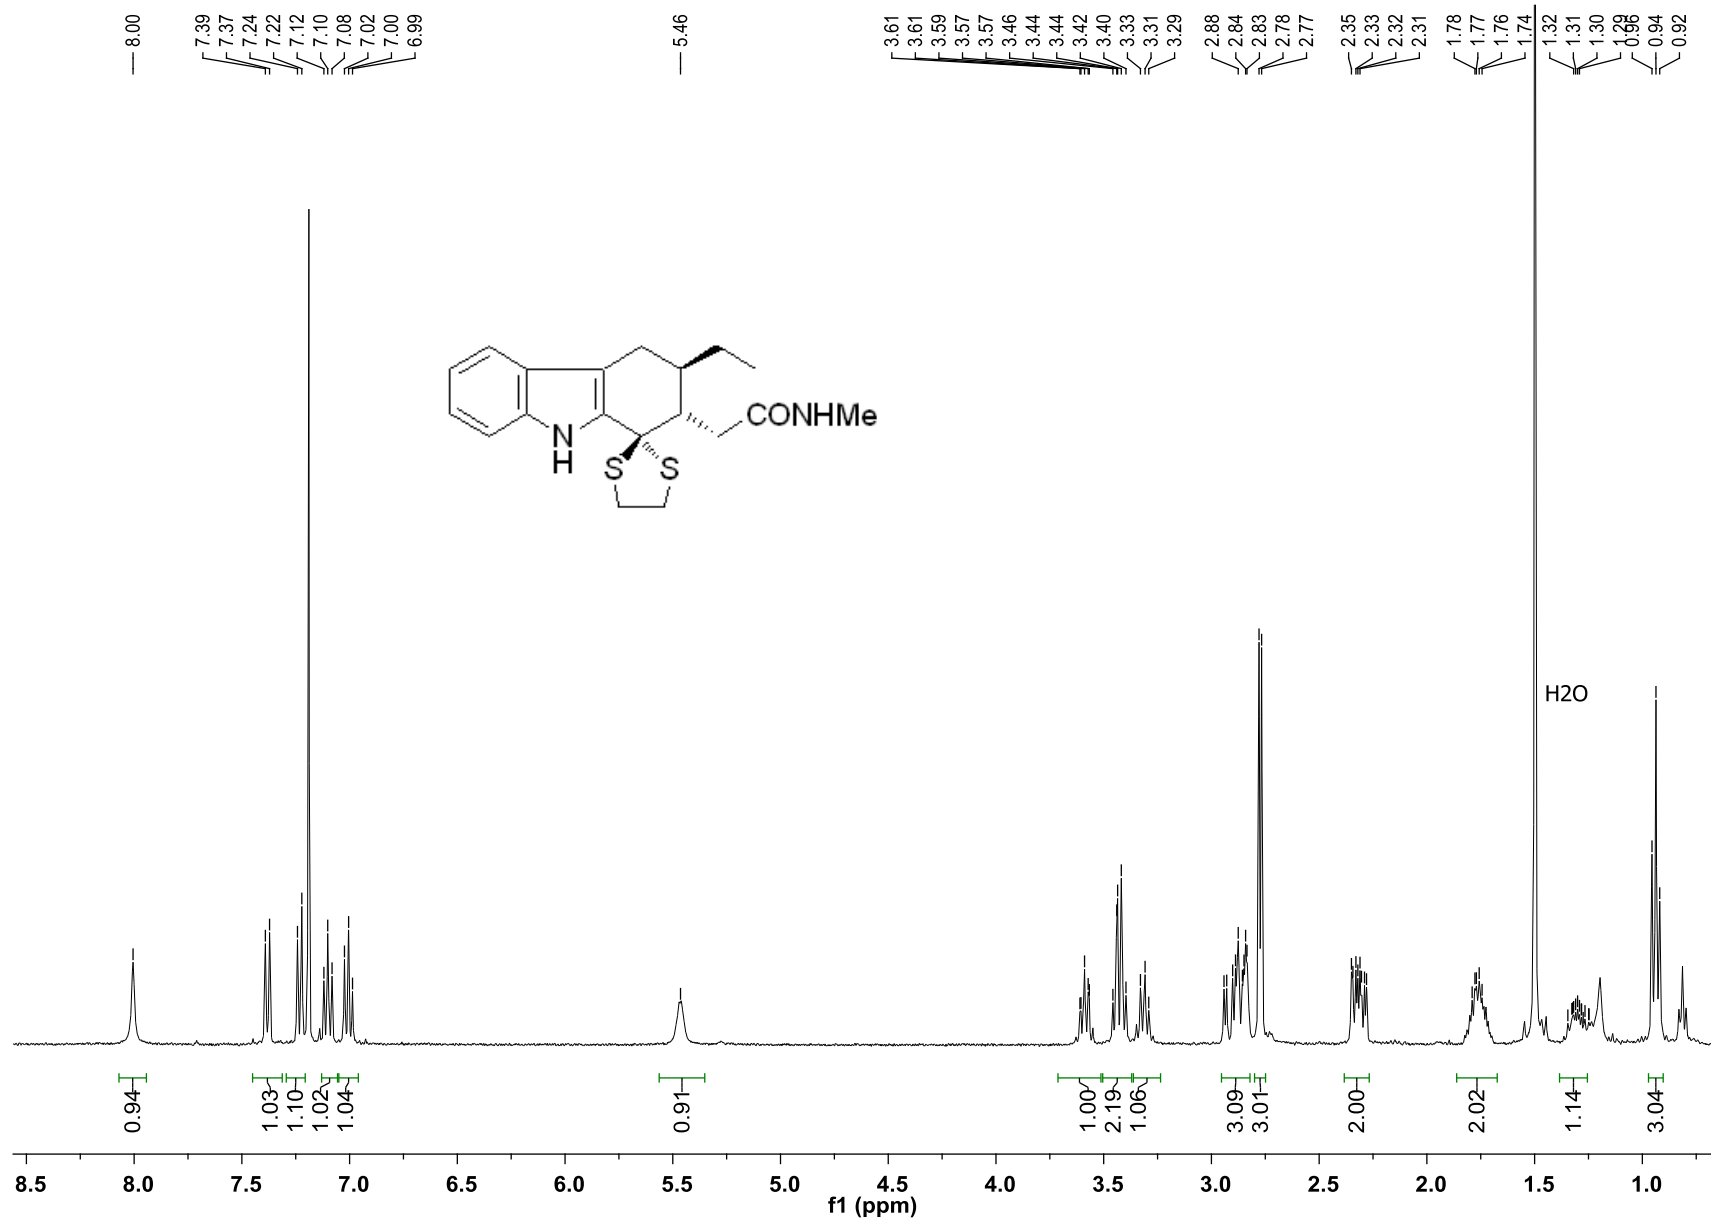

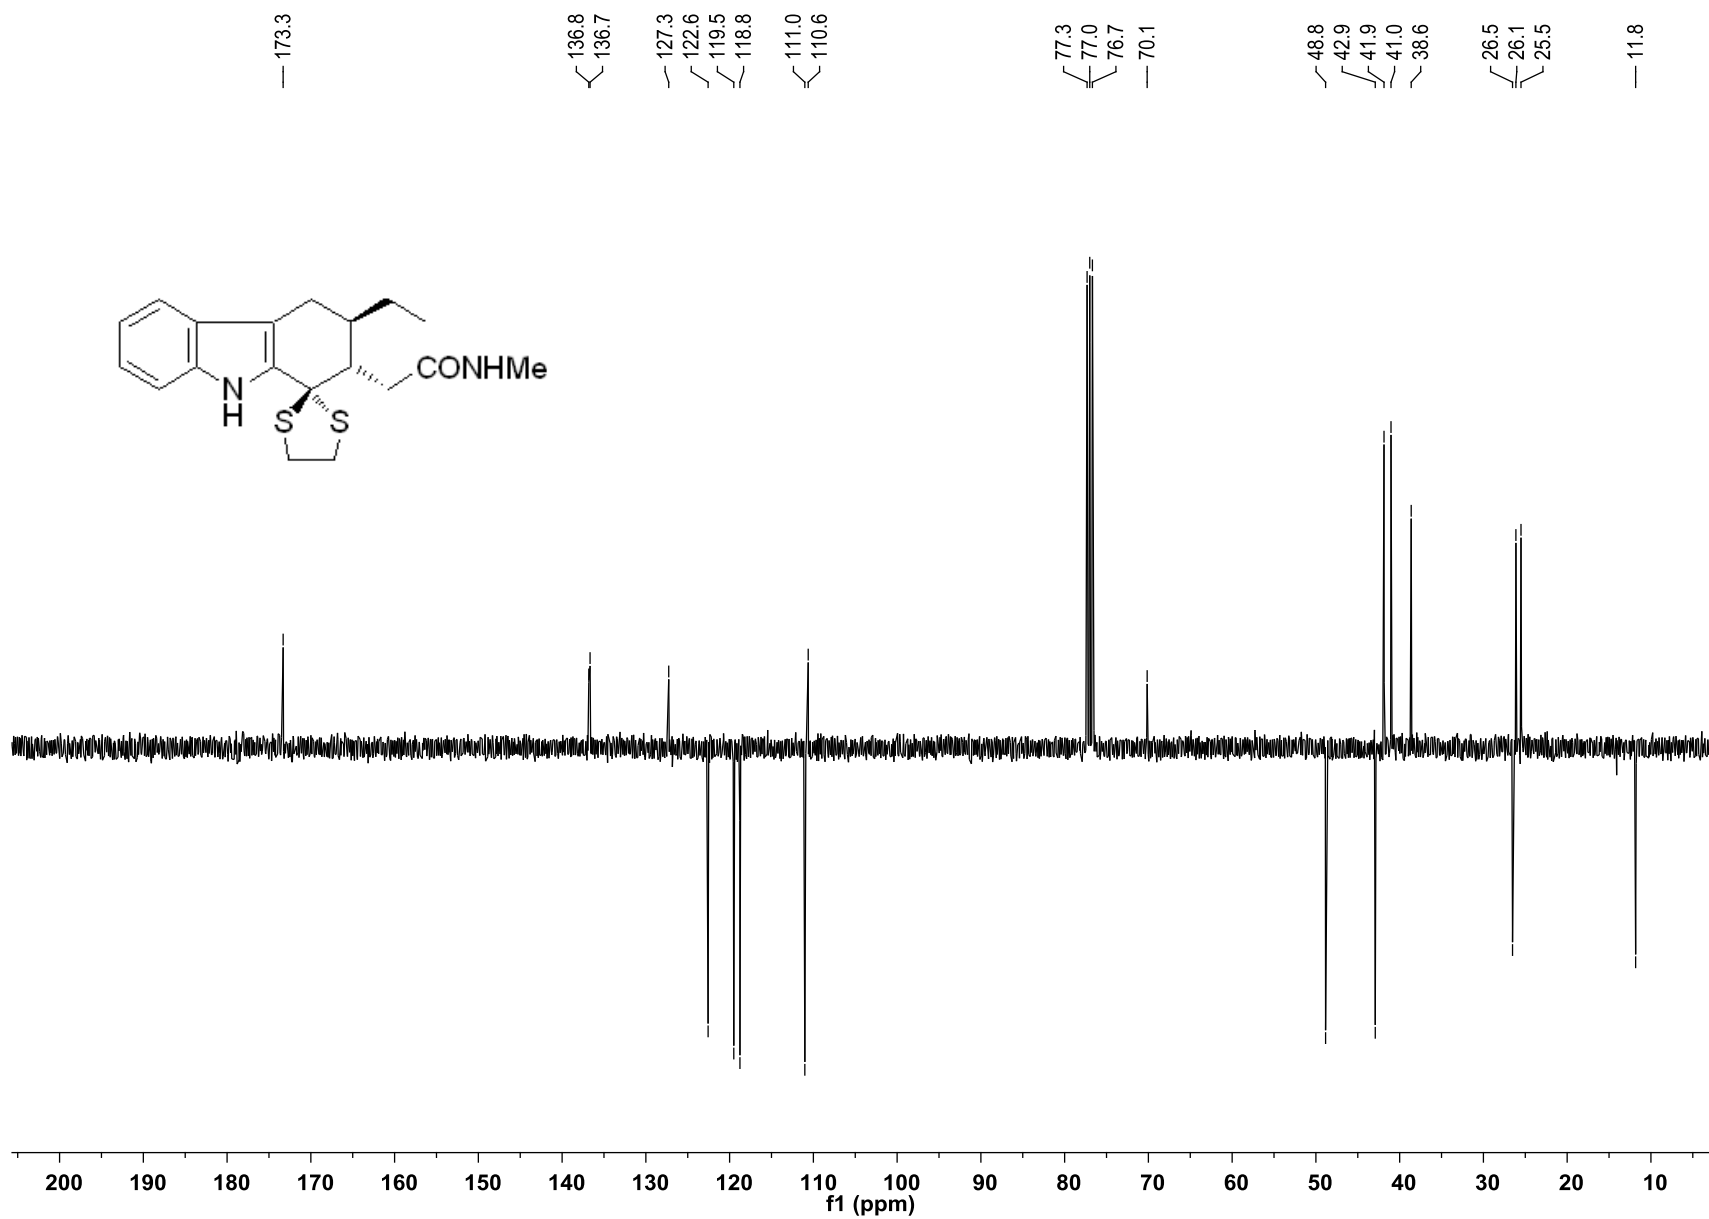

<sup>13</sup>C NMR Spectrum of (±)-10 (APT, 125 MHz, CDCl<sub>3</sub>)

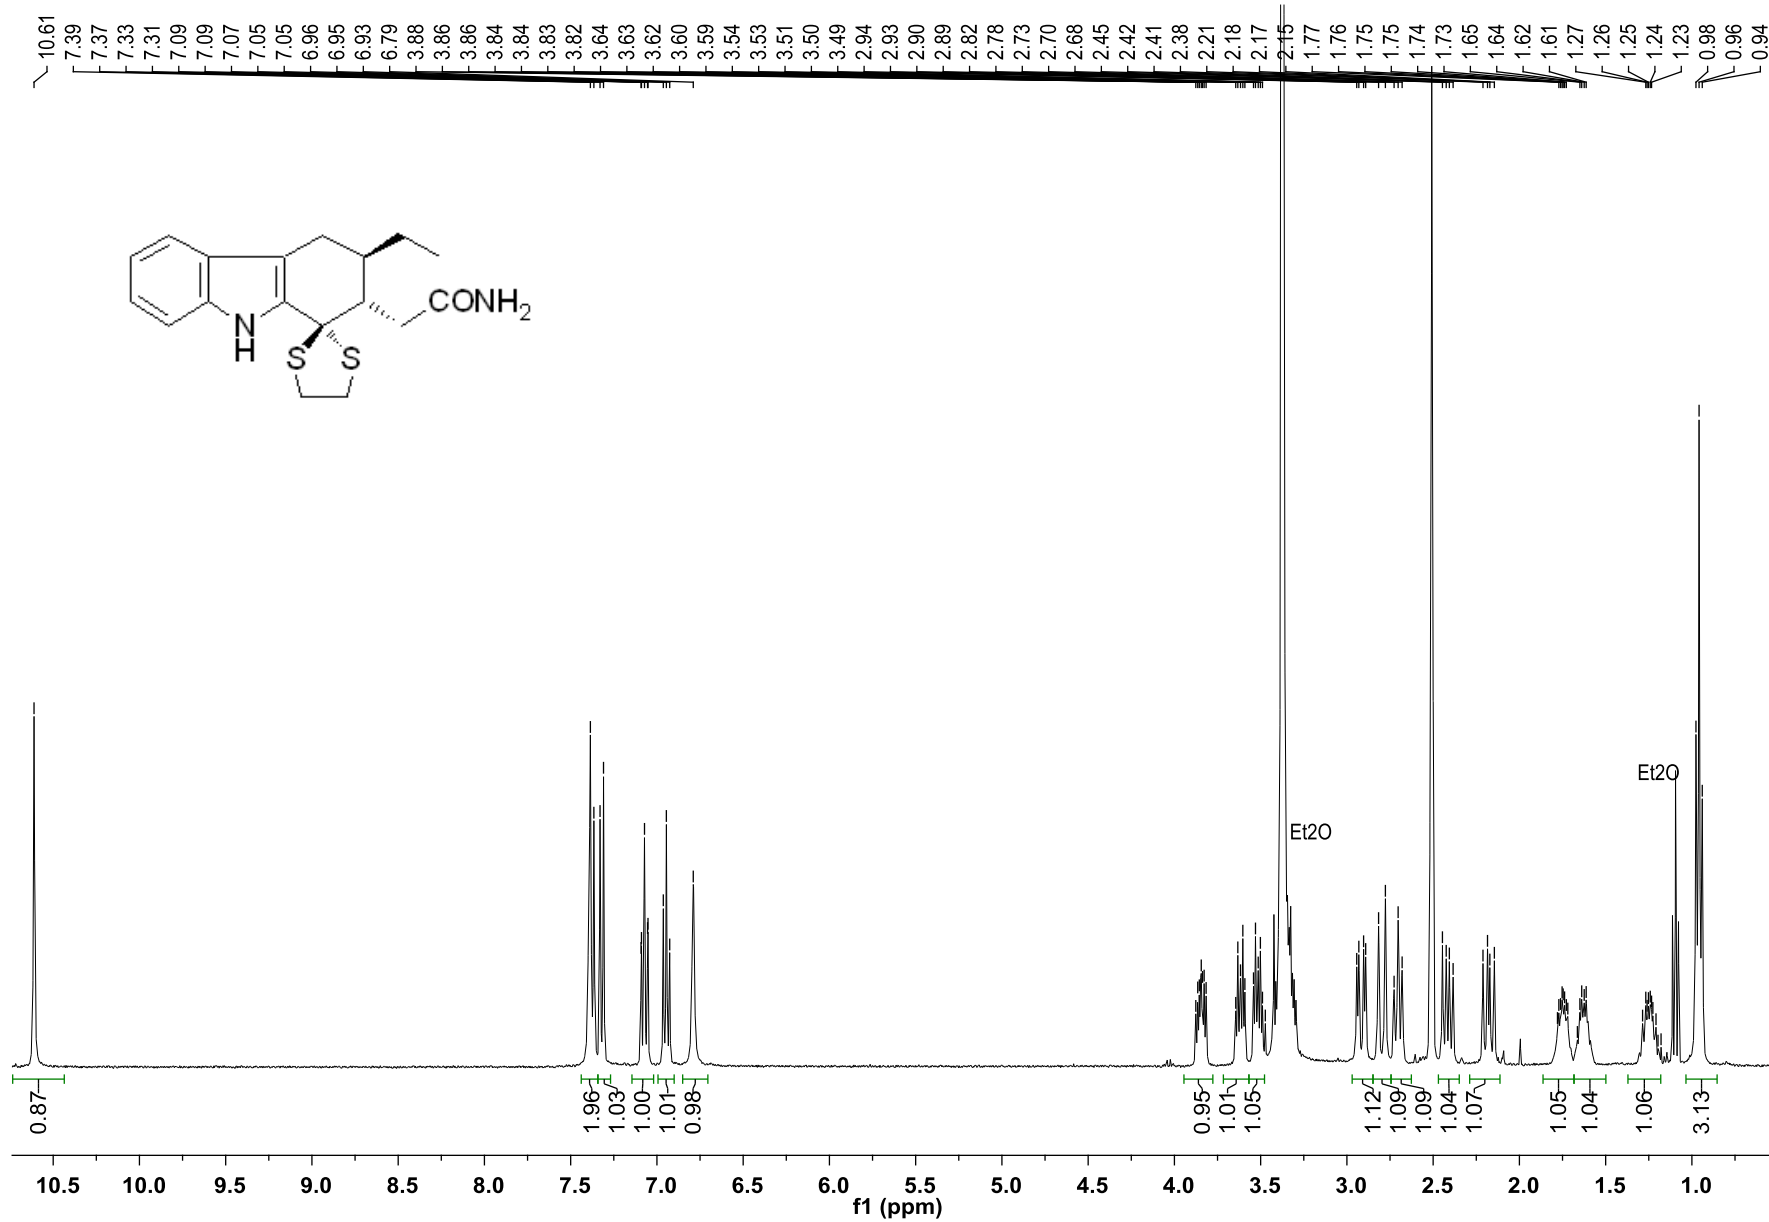

<sup>1</sup>H NMR Spectrum of (±)-11 (500 MHz, DMSO-d<sub>6</sub>)

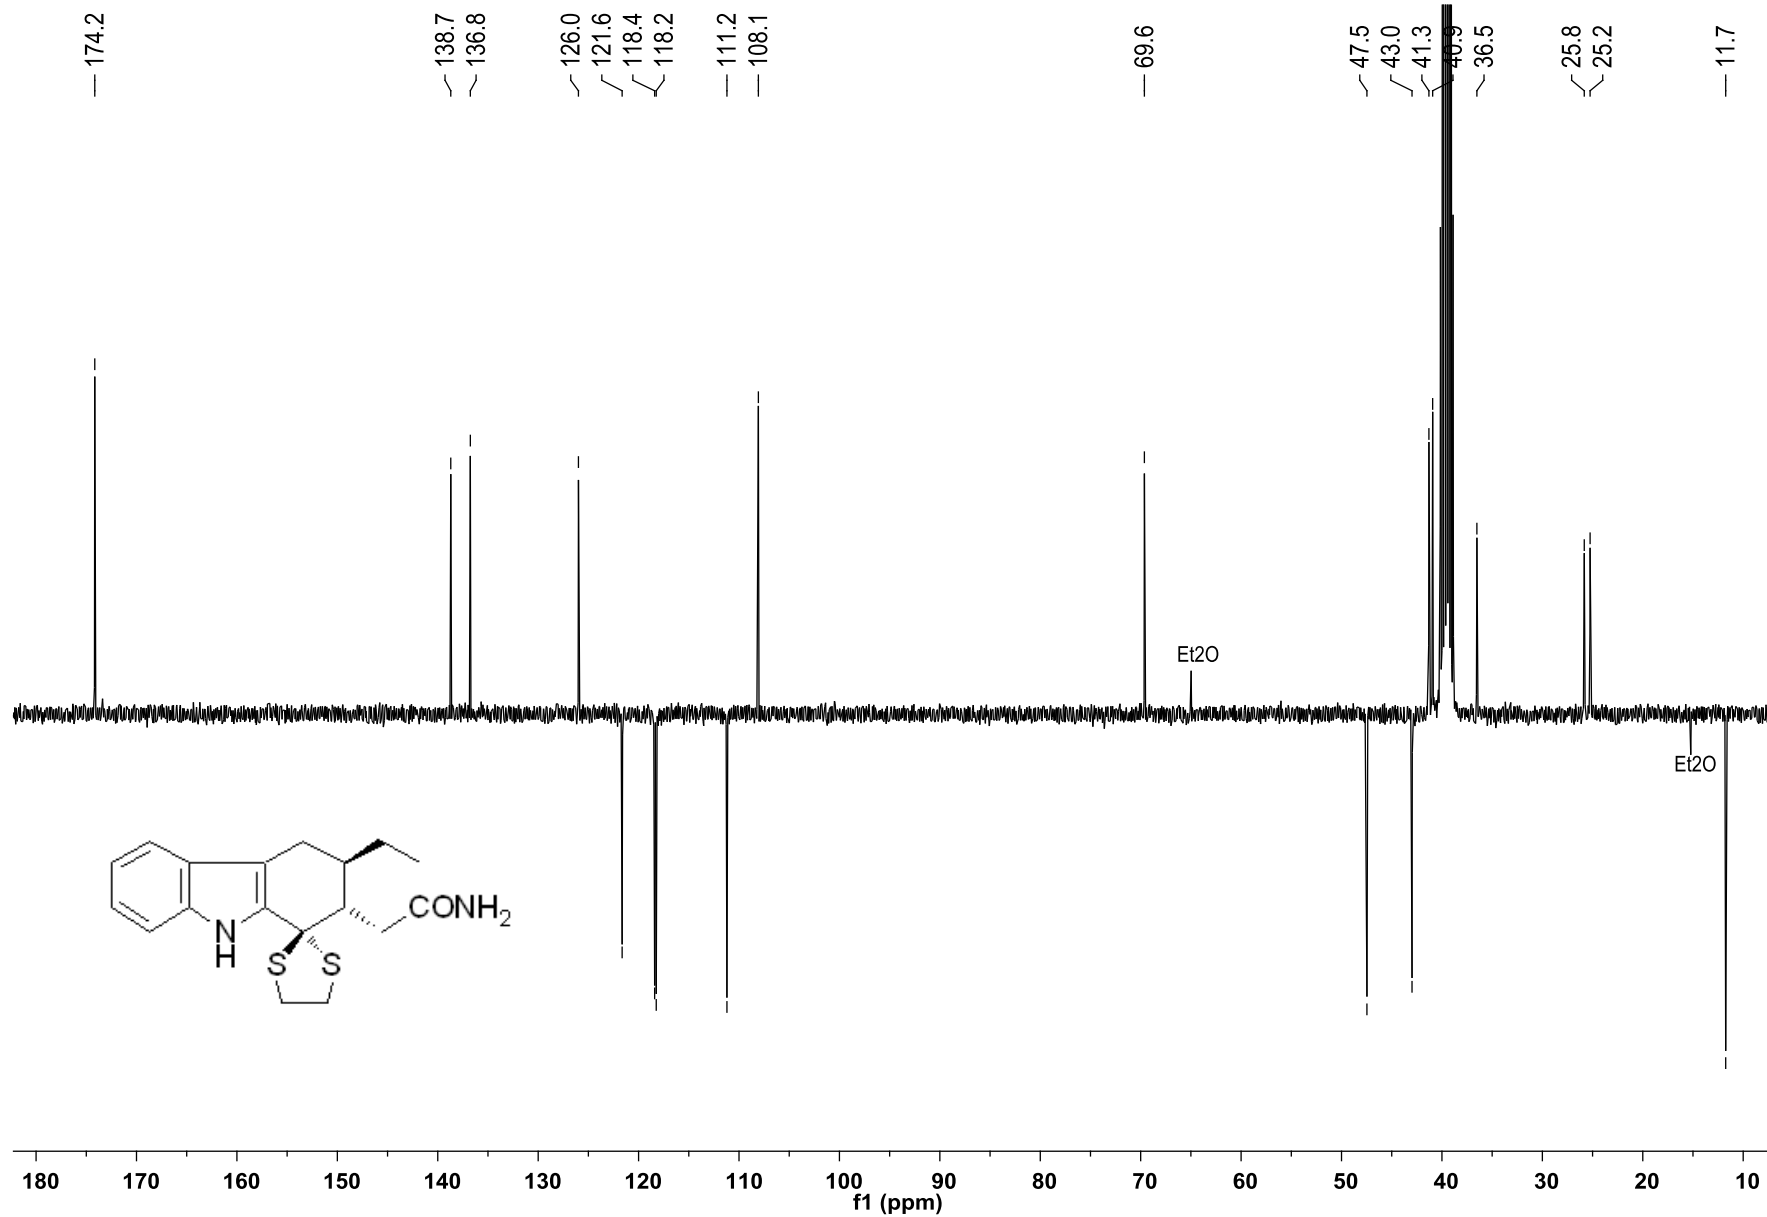

$^{13}\text{C}$  NMR Spectrum of ( $\pm$ )-11 (APT, 125 MHz, DMSO- $d_6$ )

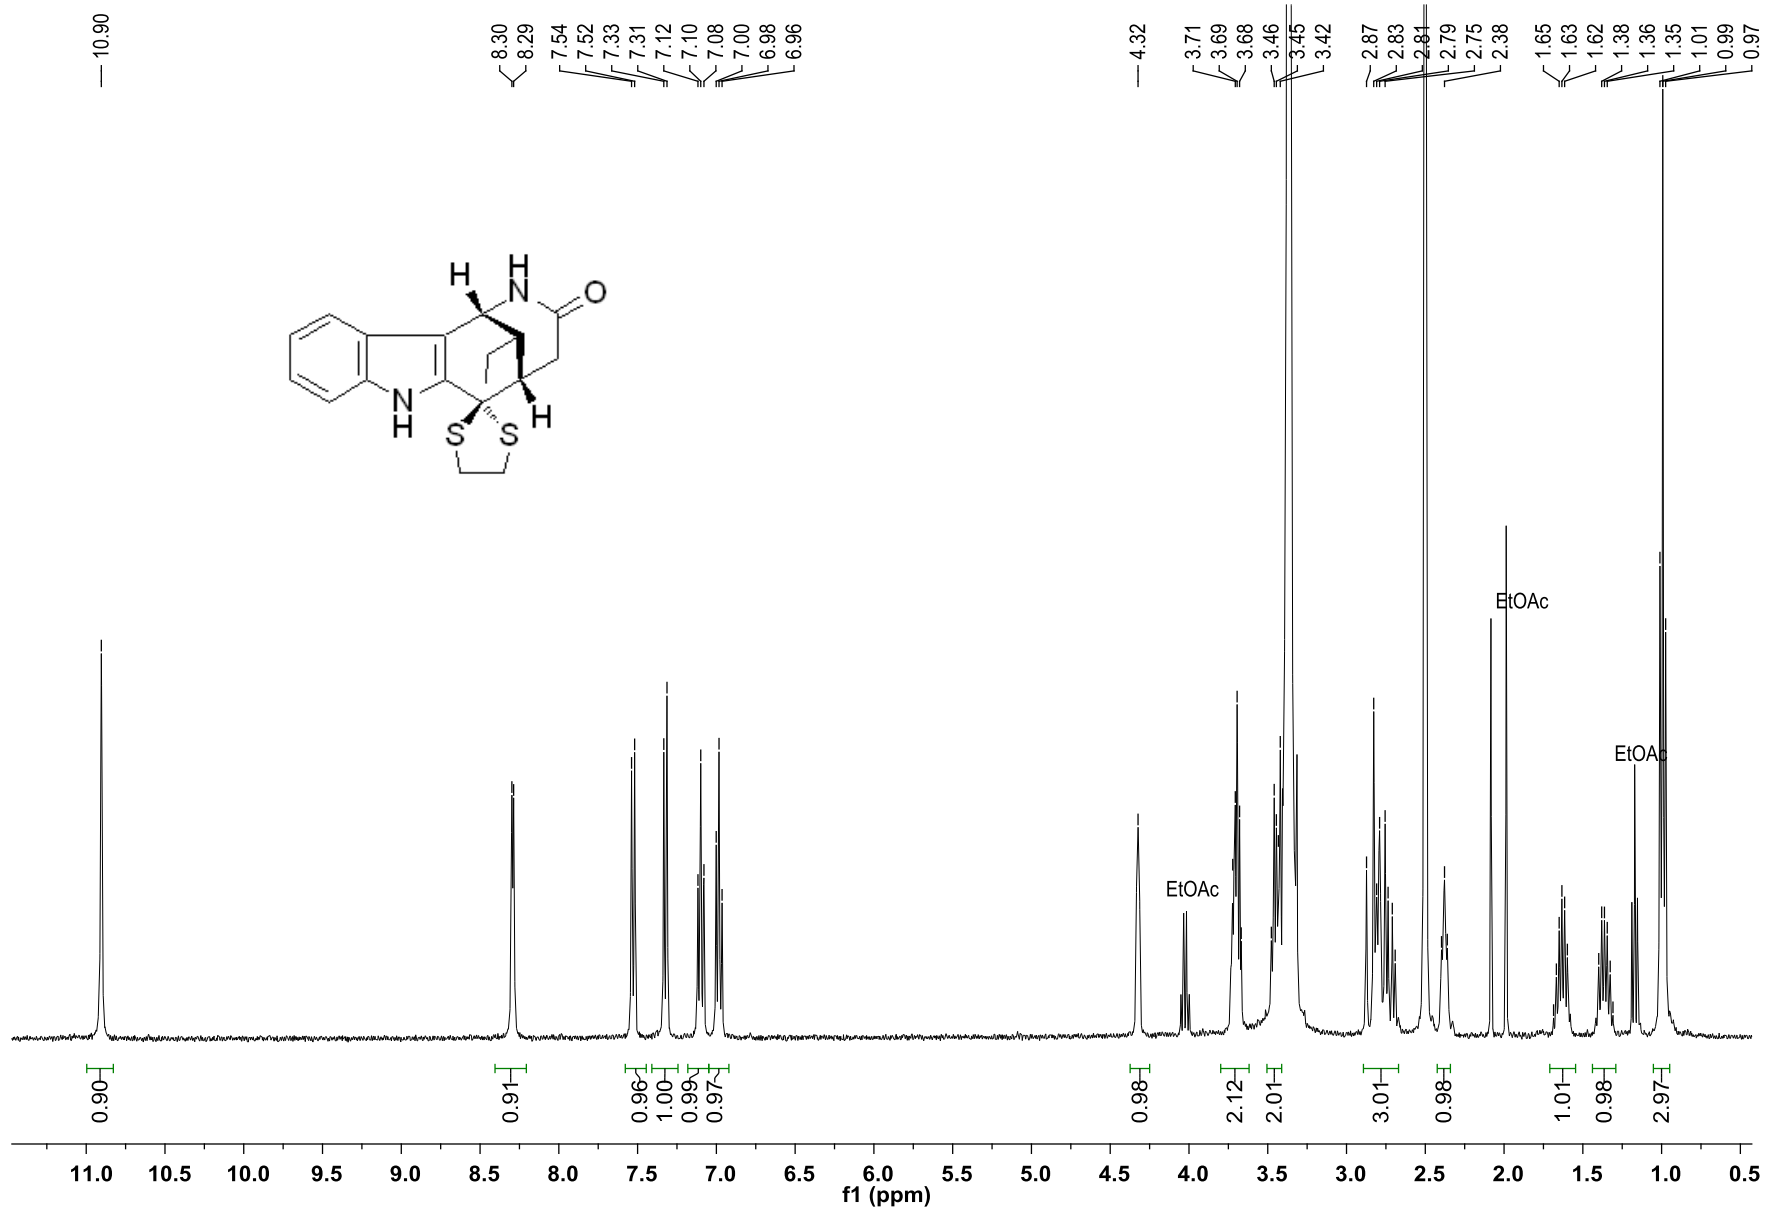



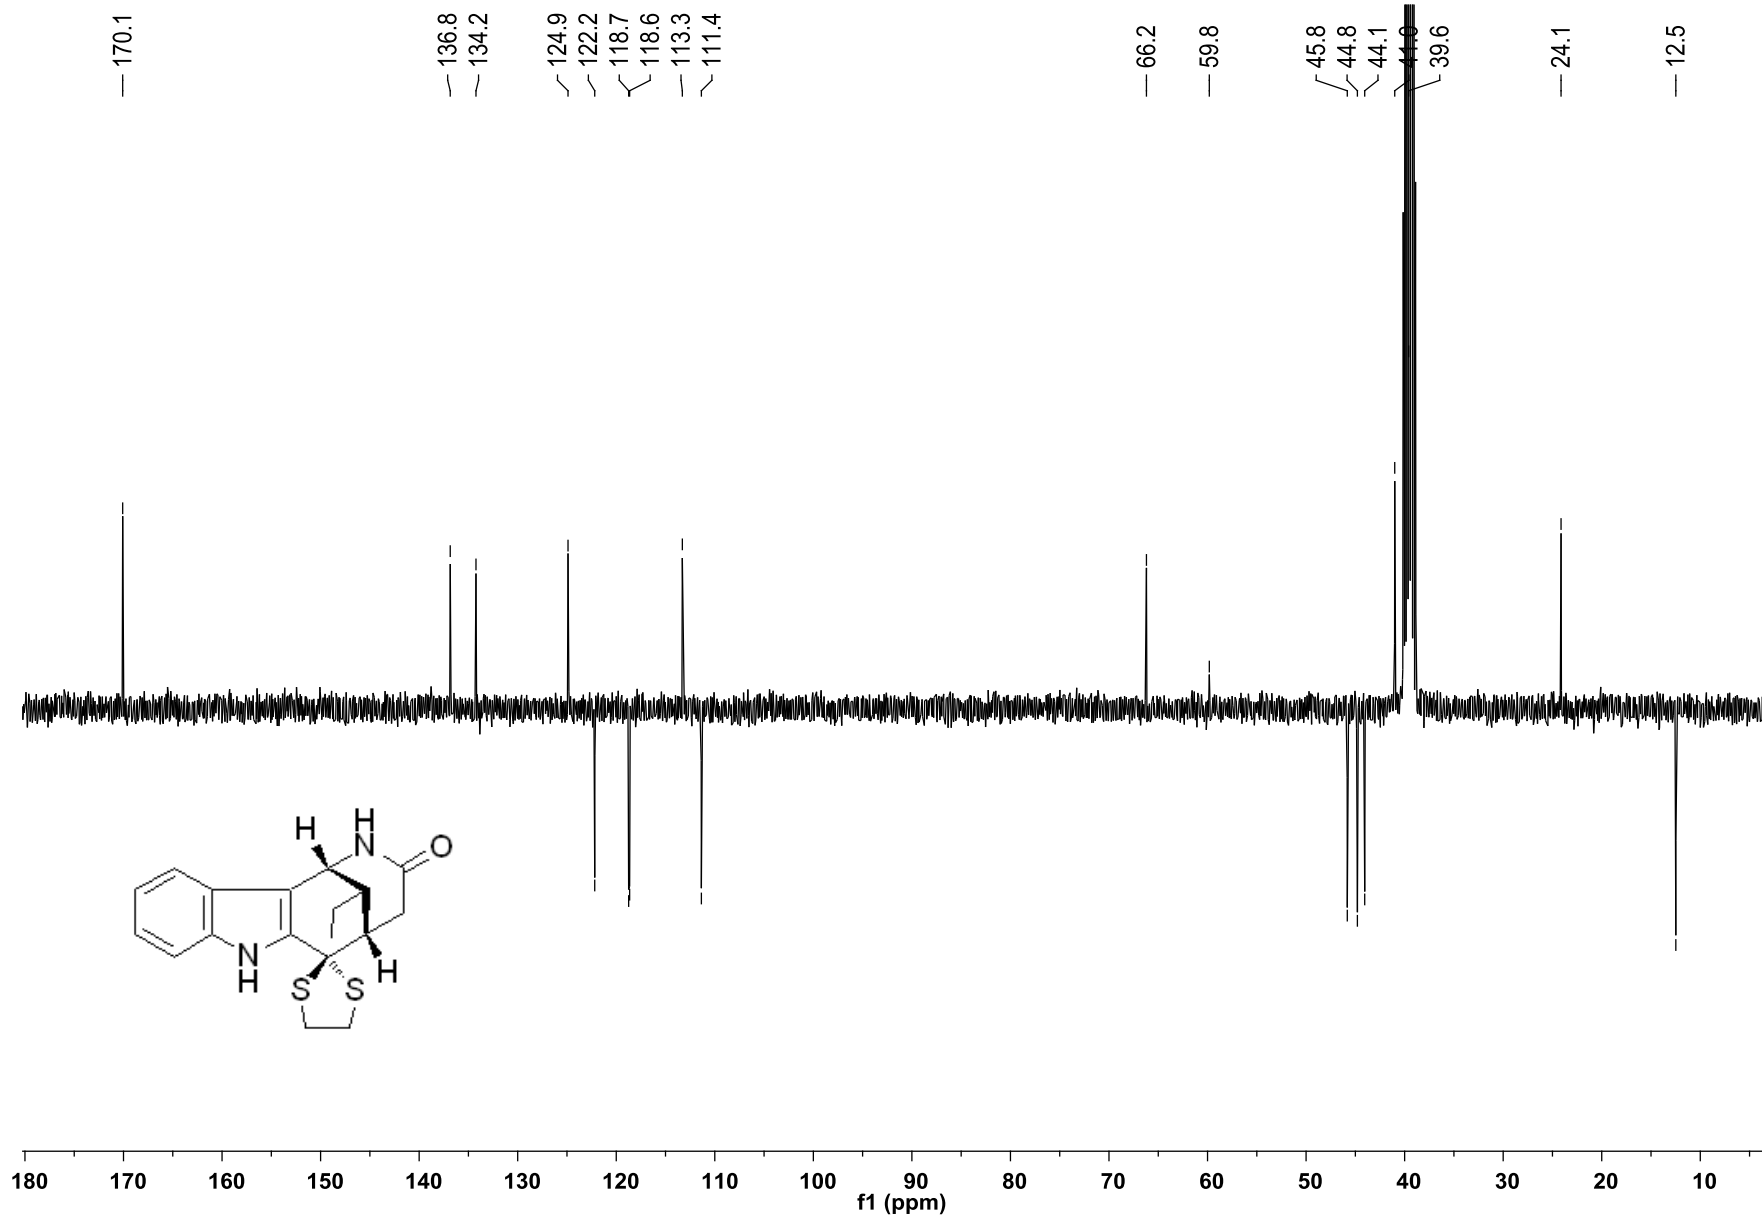

$^{13}\text{C}$  NMR Spectrum of ( $\pm$ )-12 (APT, 125 MHz, DMSO- $\text{d}_6$ )

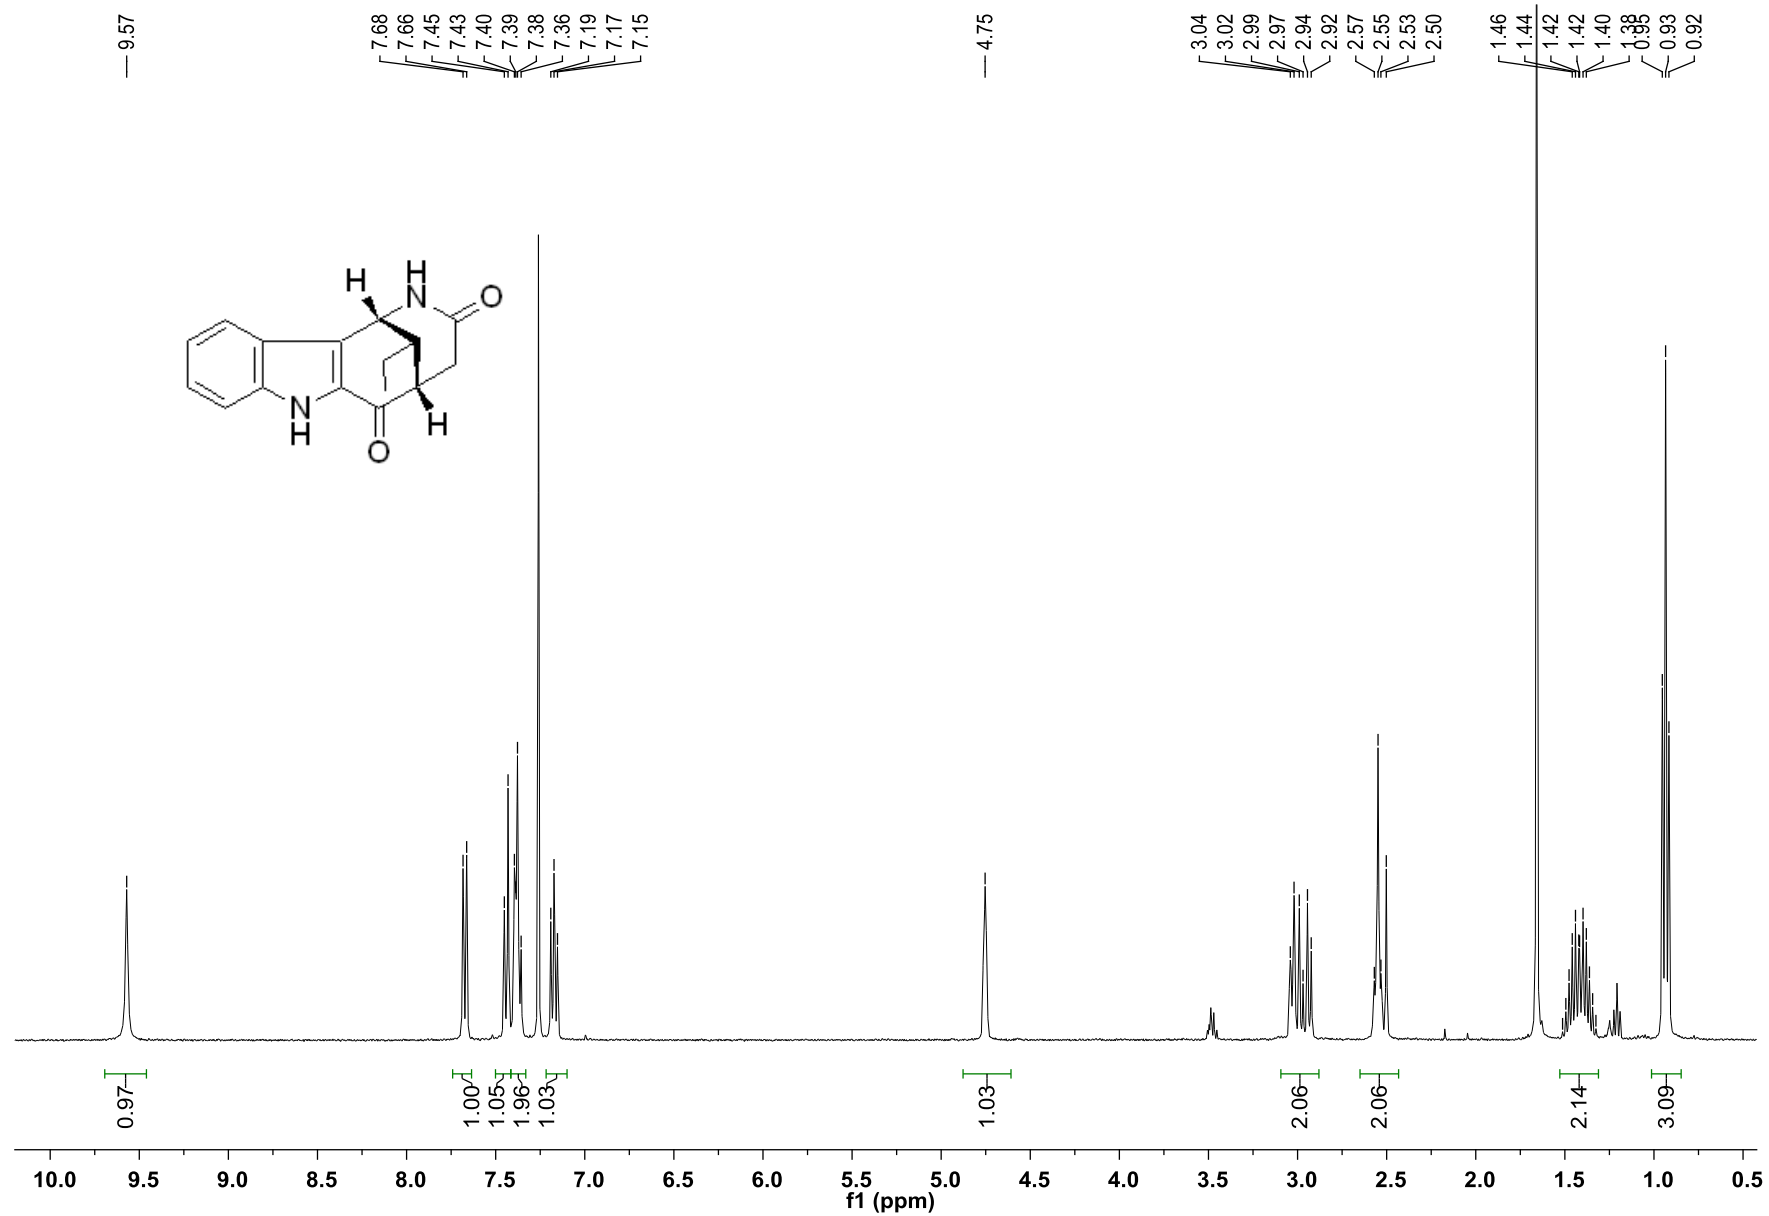

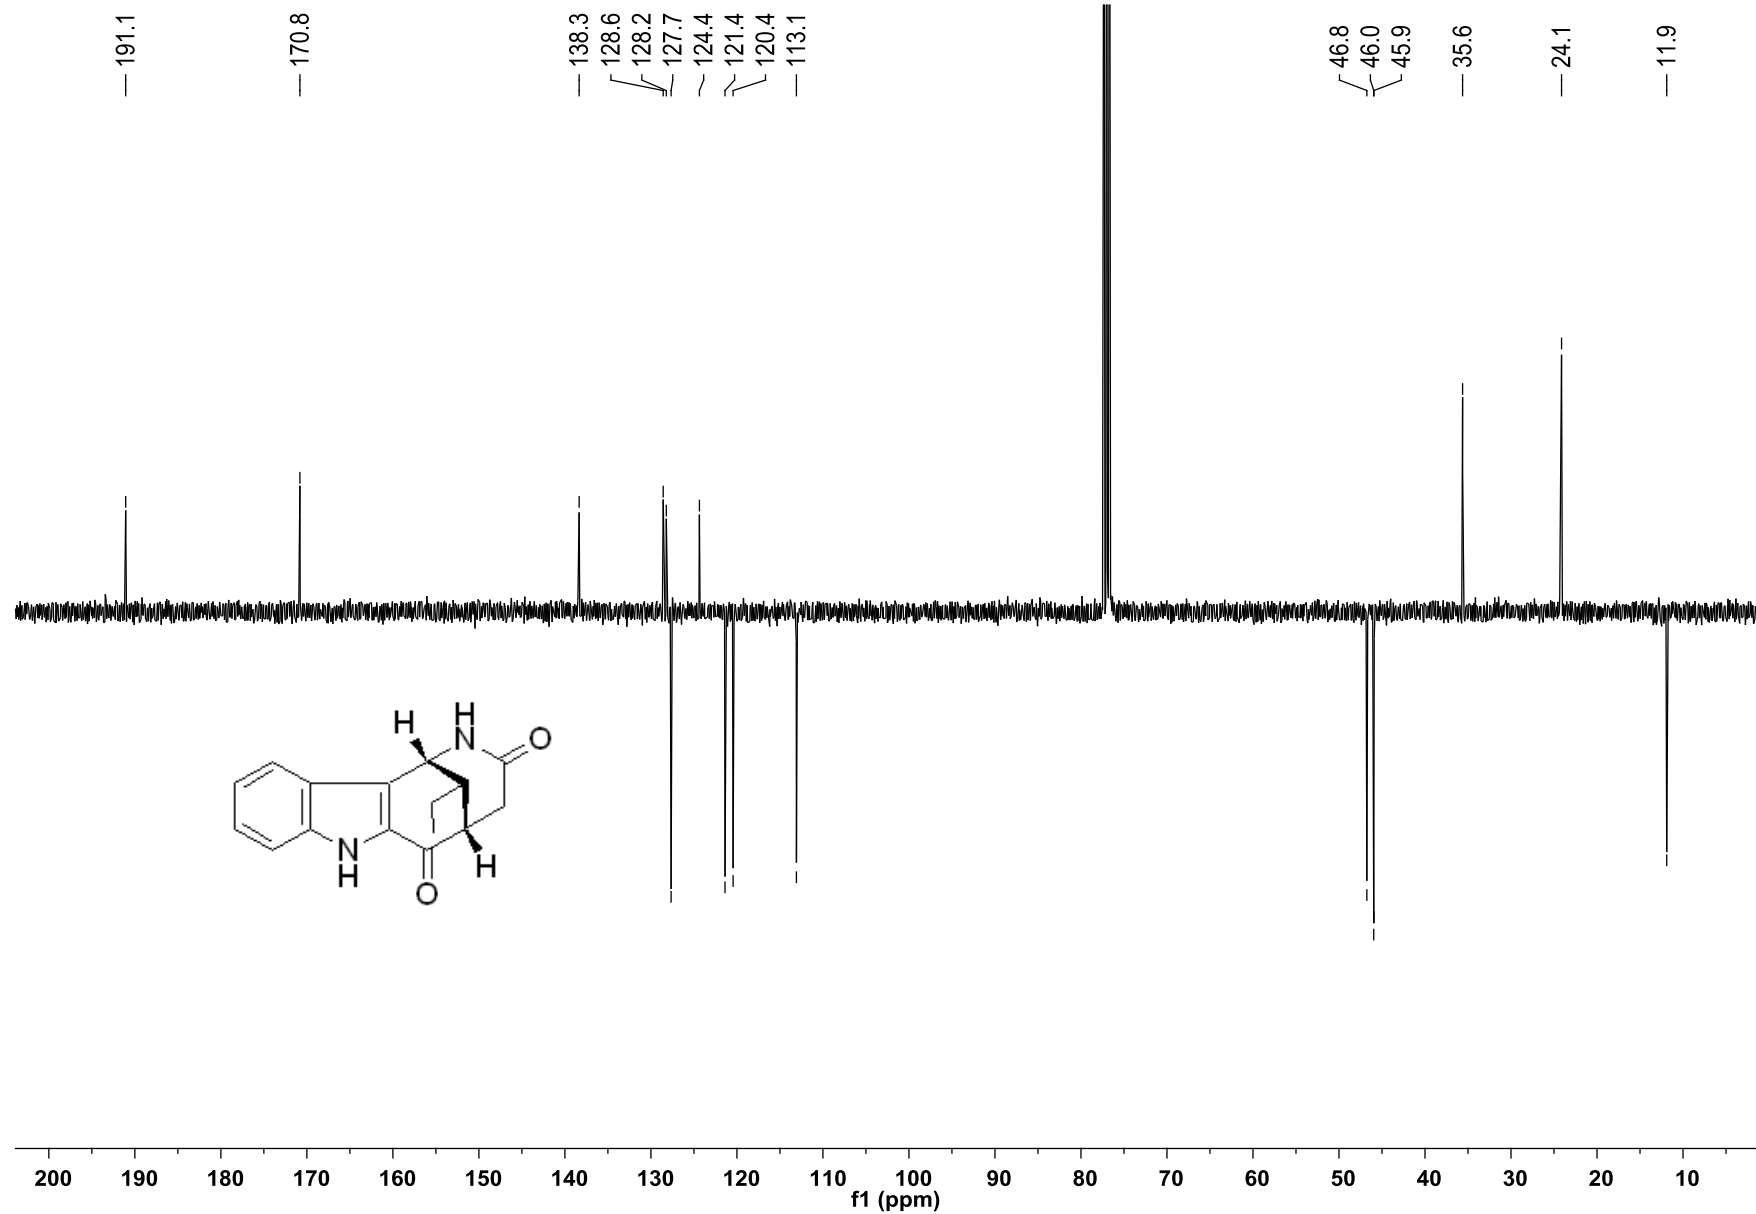

$^{13}\text{C}$  NMR Spectrum of ( $\pm$ )-13 (APT, 125 MHz,  $\text{CDCl}_3$ )

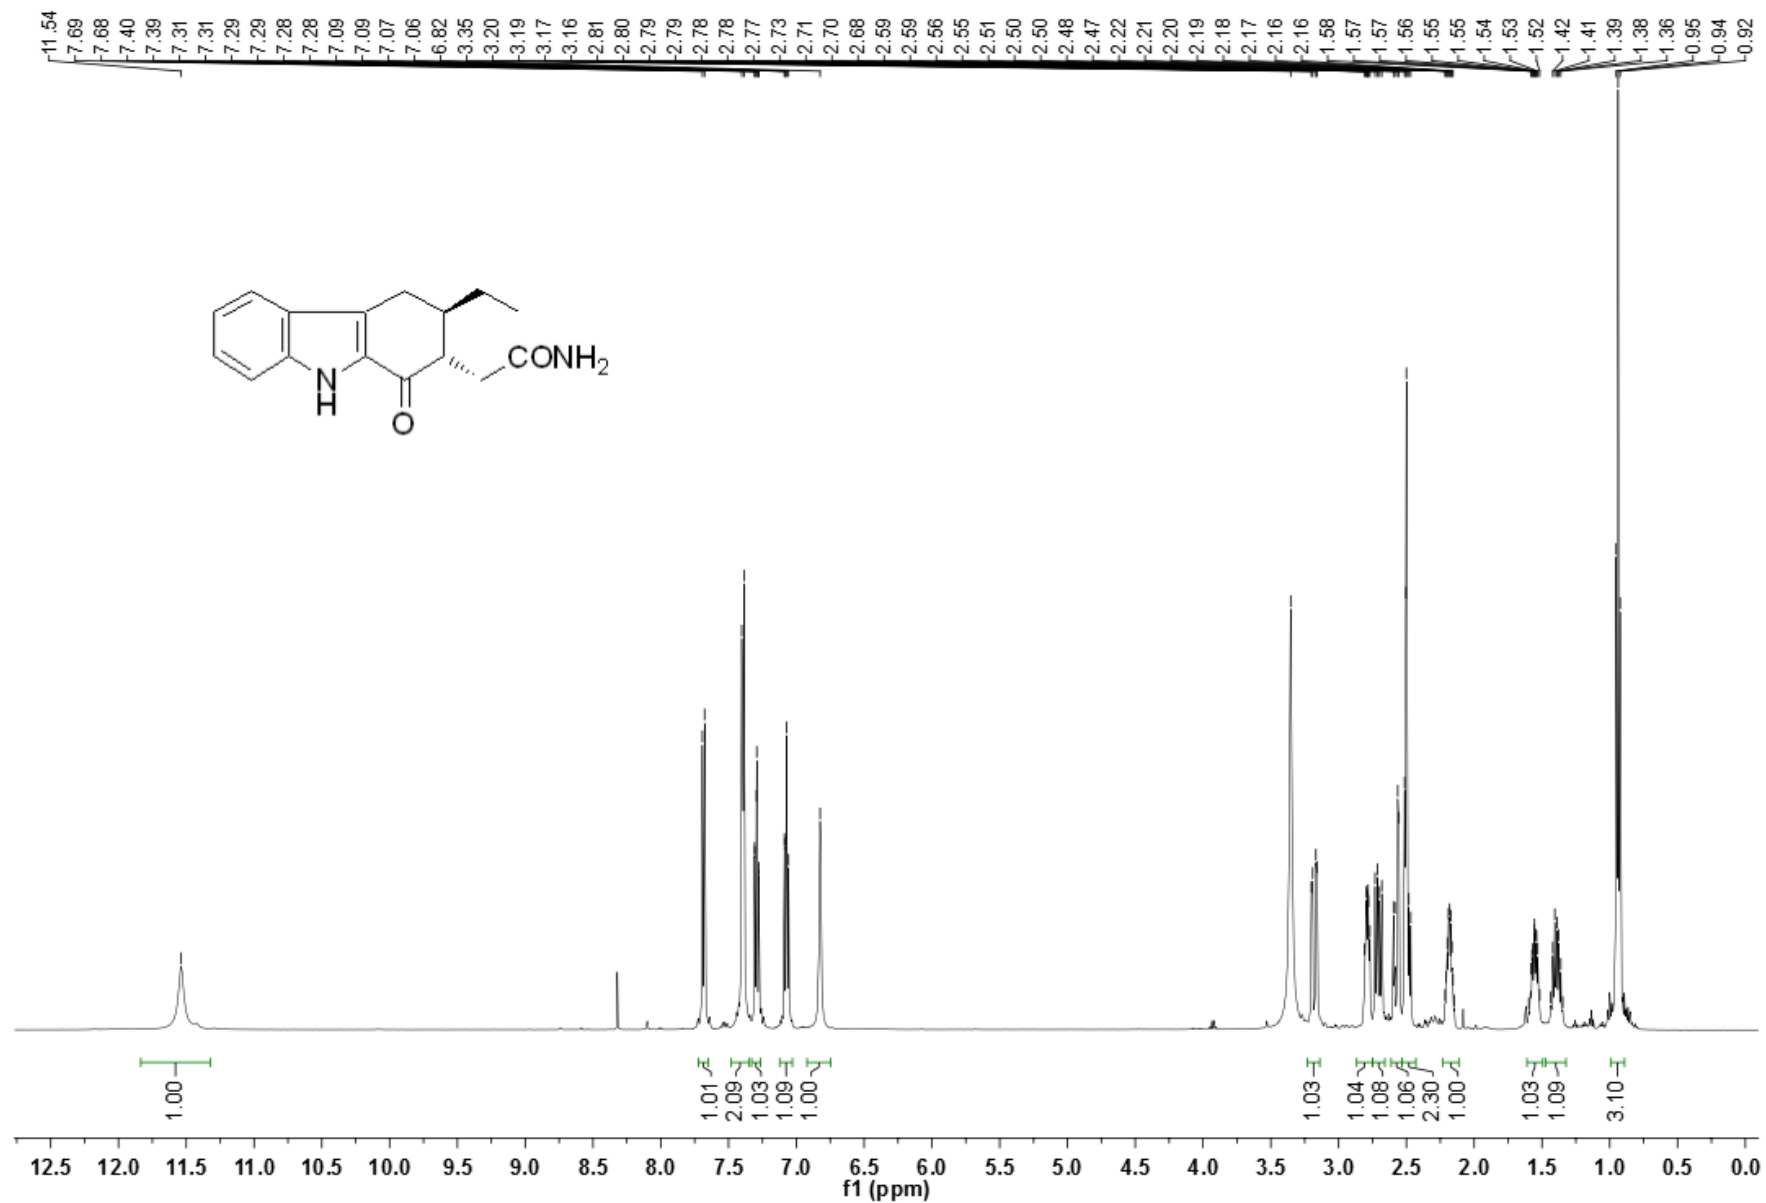

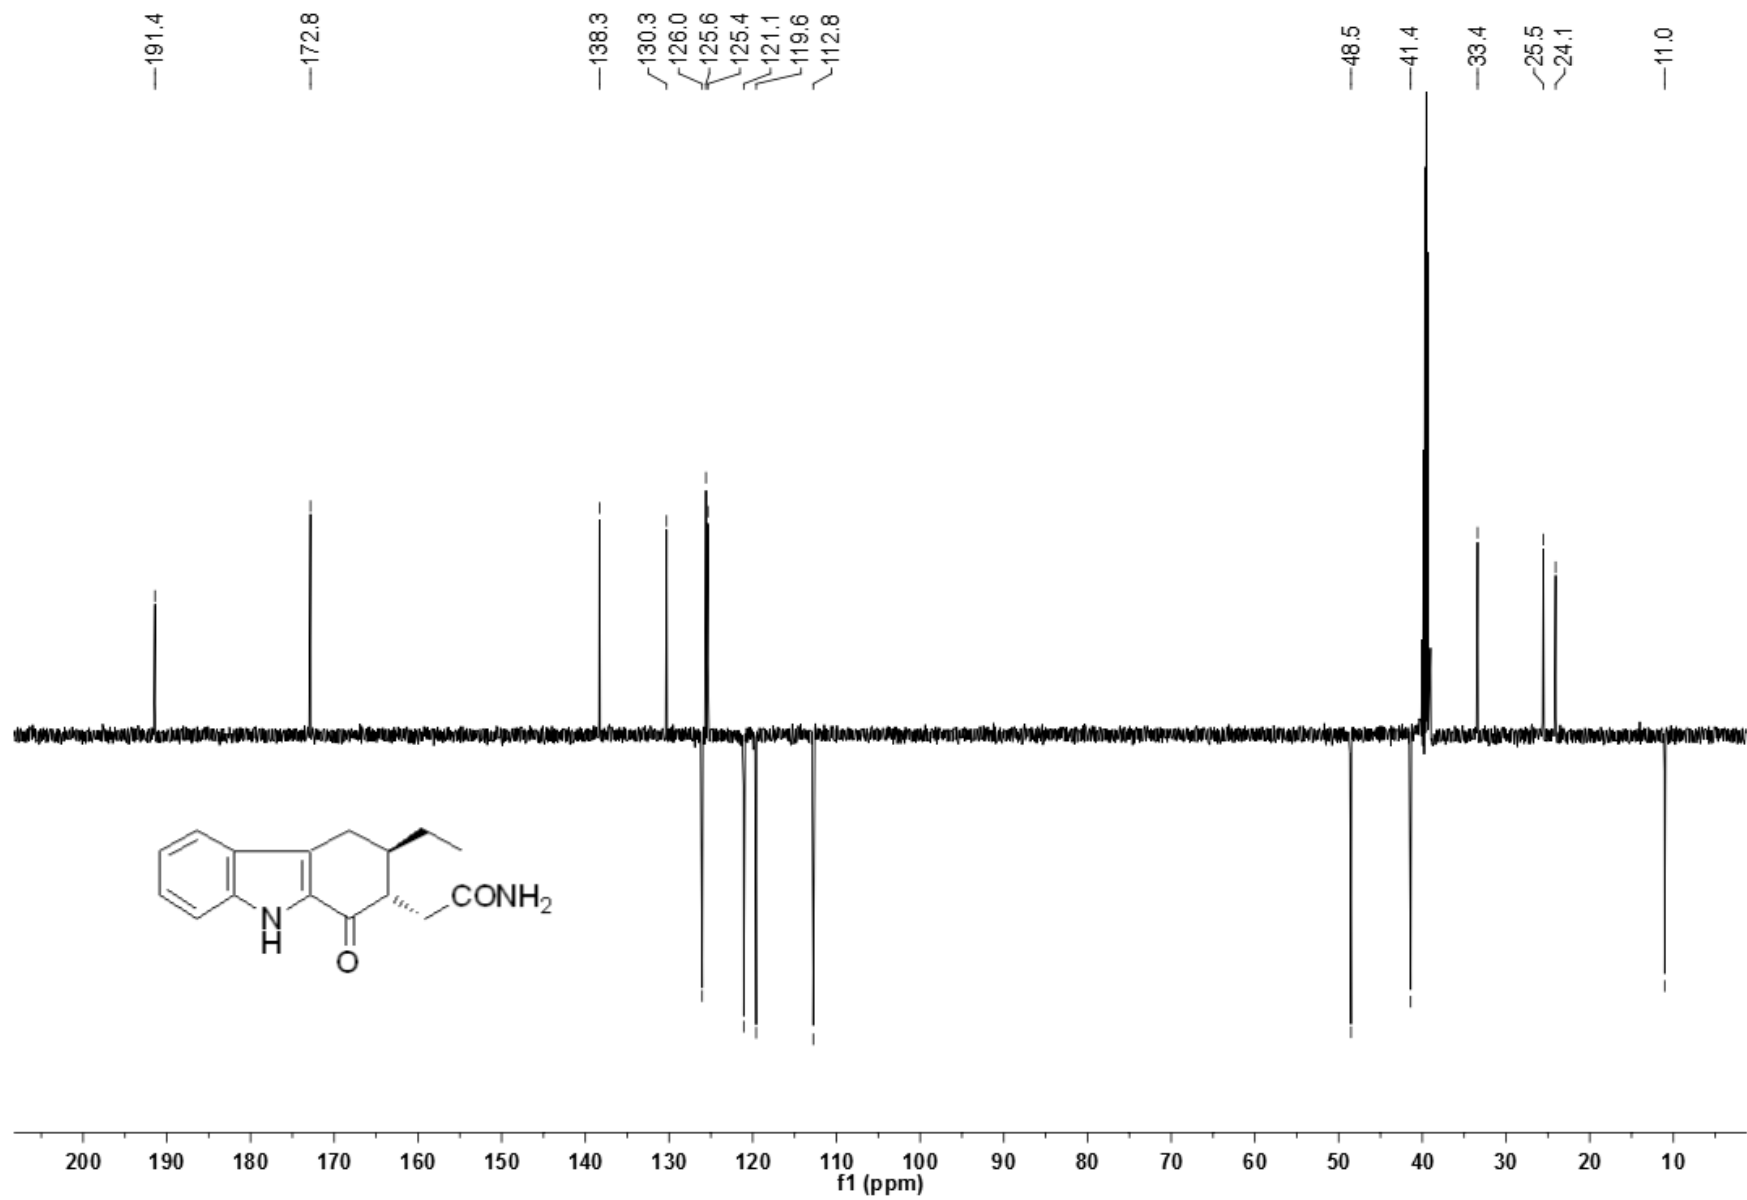

$^{13}\text{C}$  NMR Spectrum of ( $\pm$ )-**14** (APT, 125 MHz, DMSO- $d_6$ )

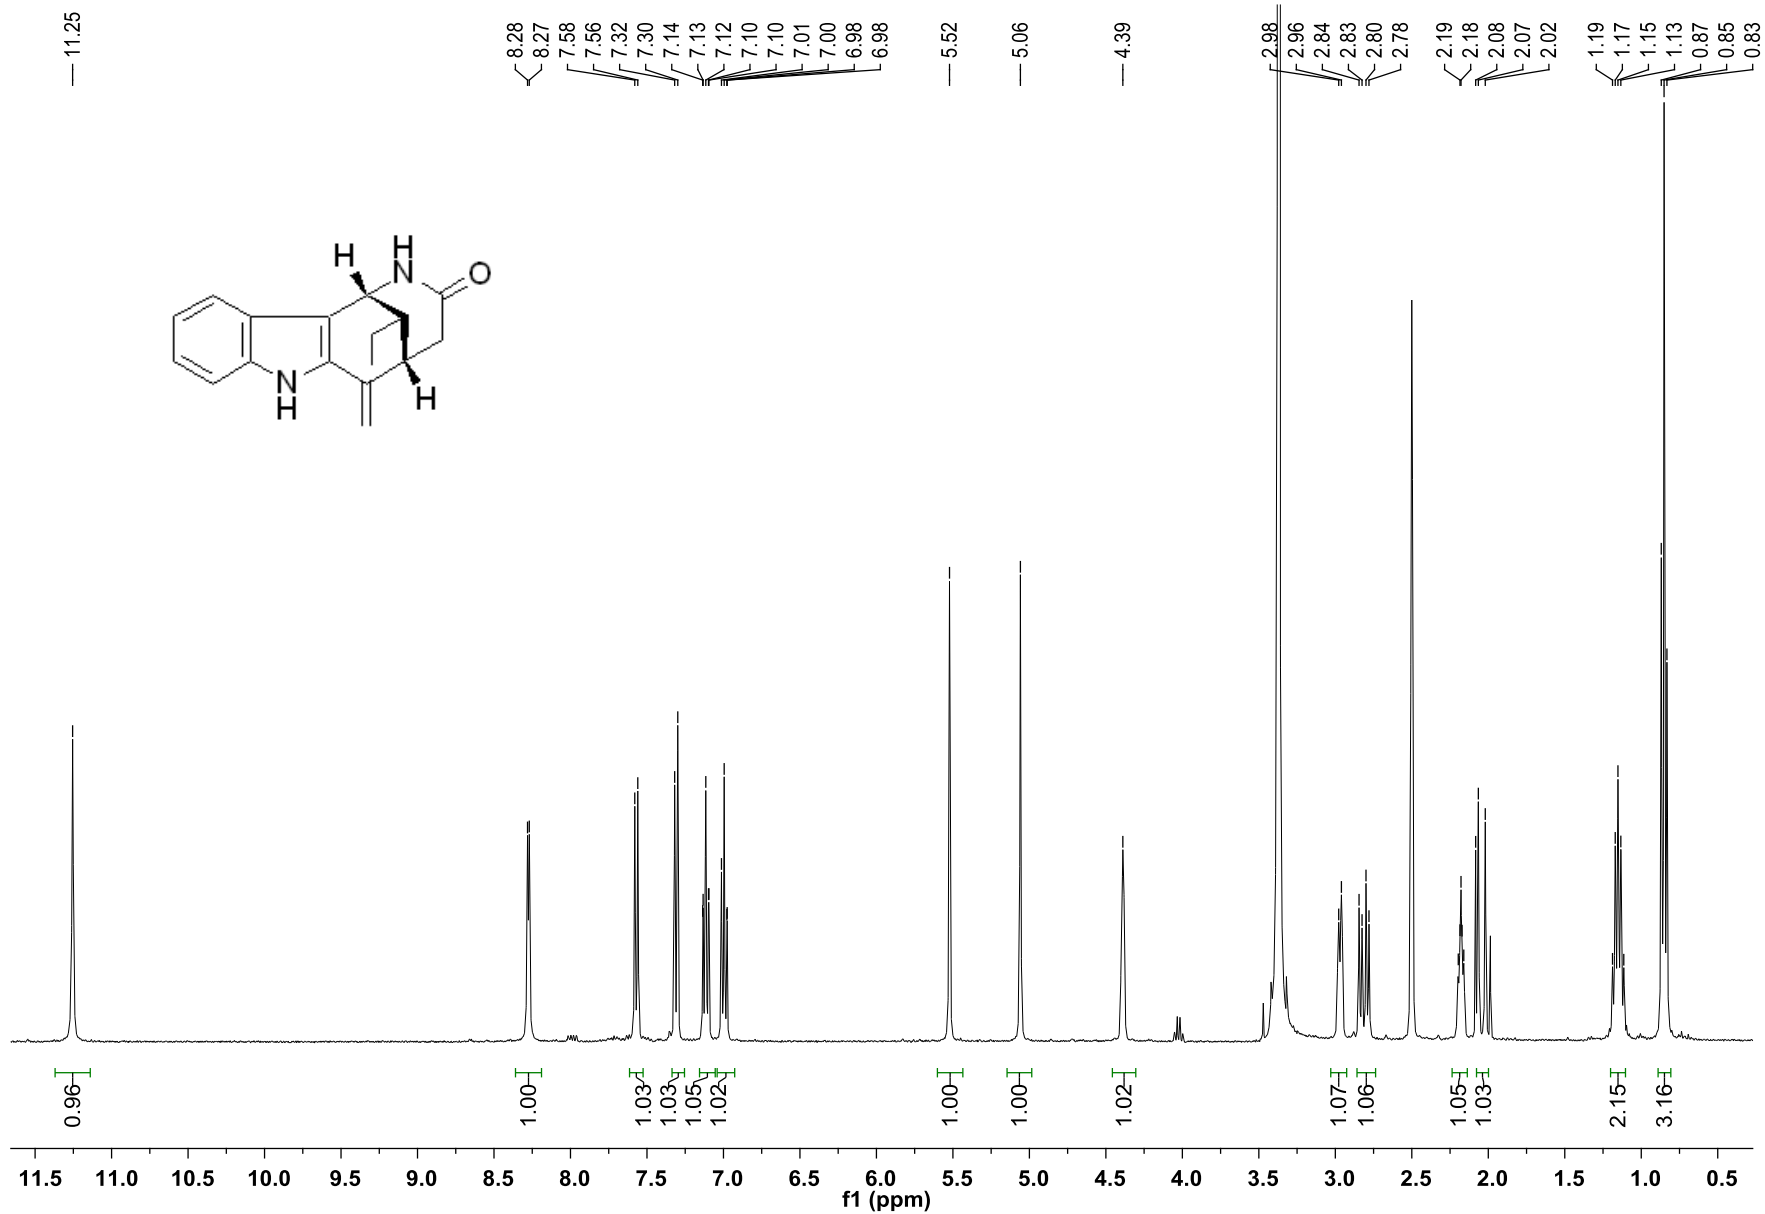

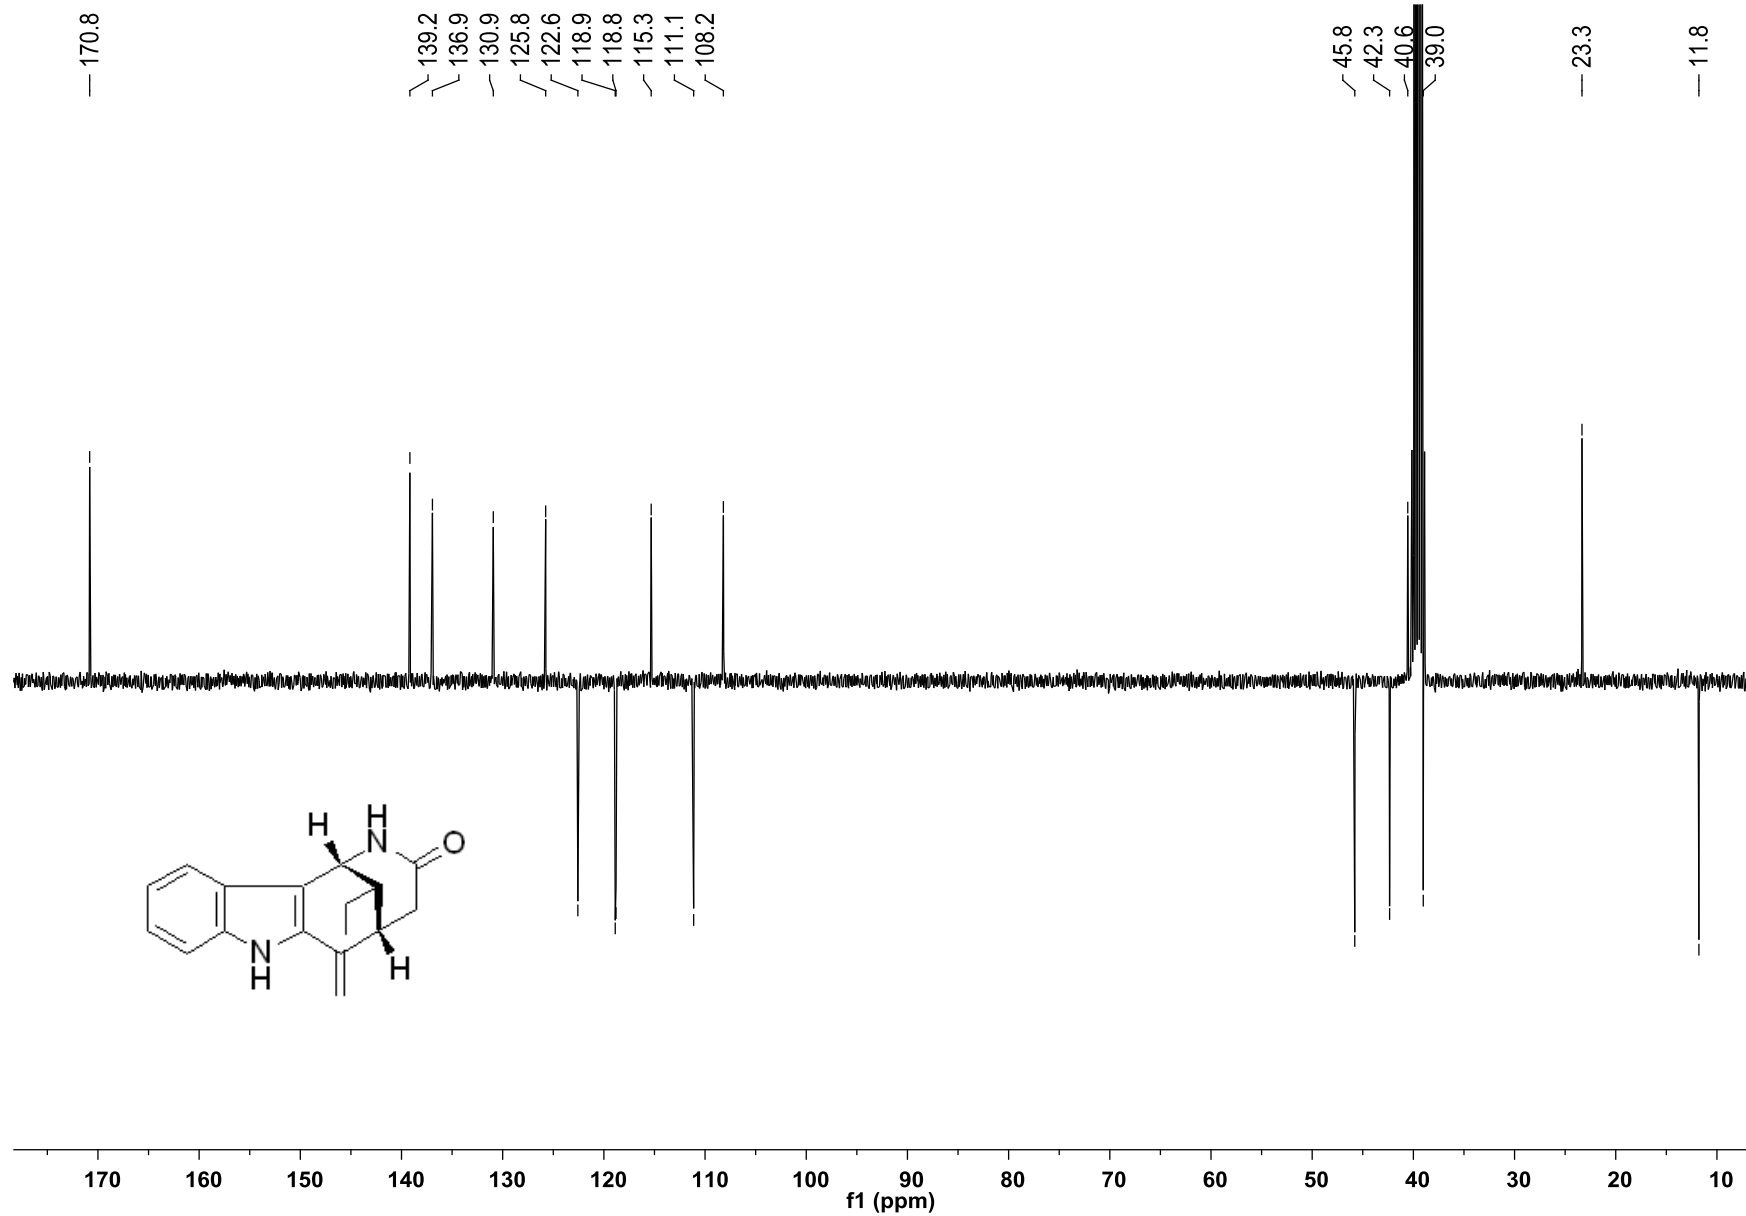

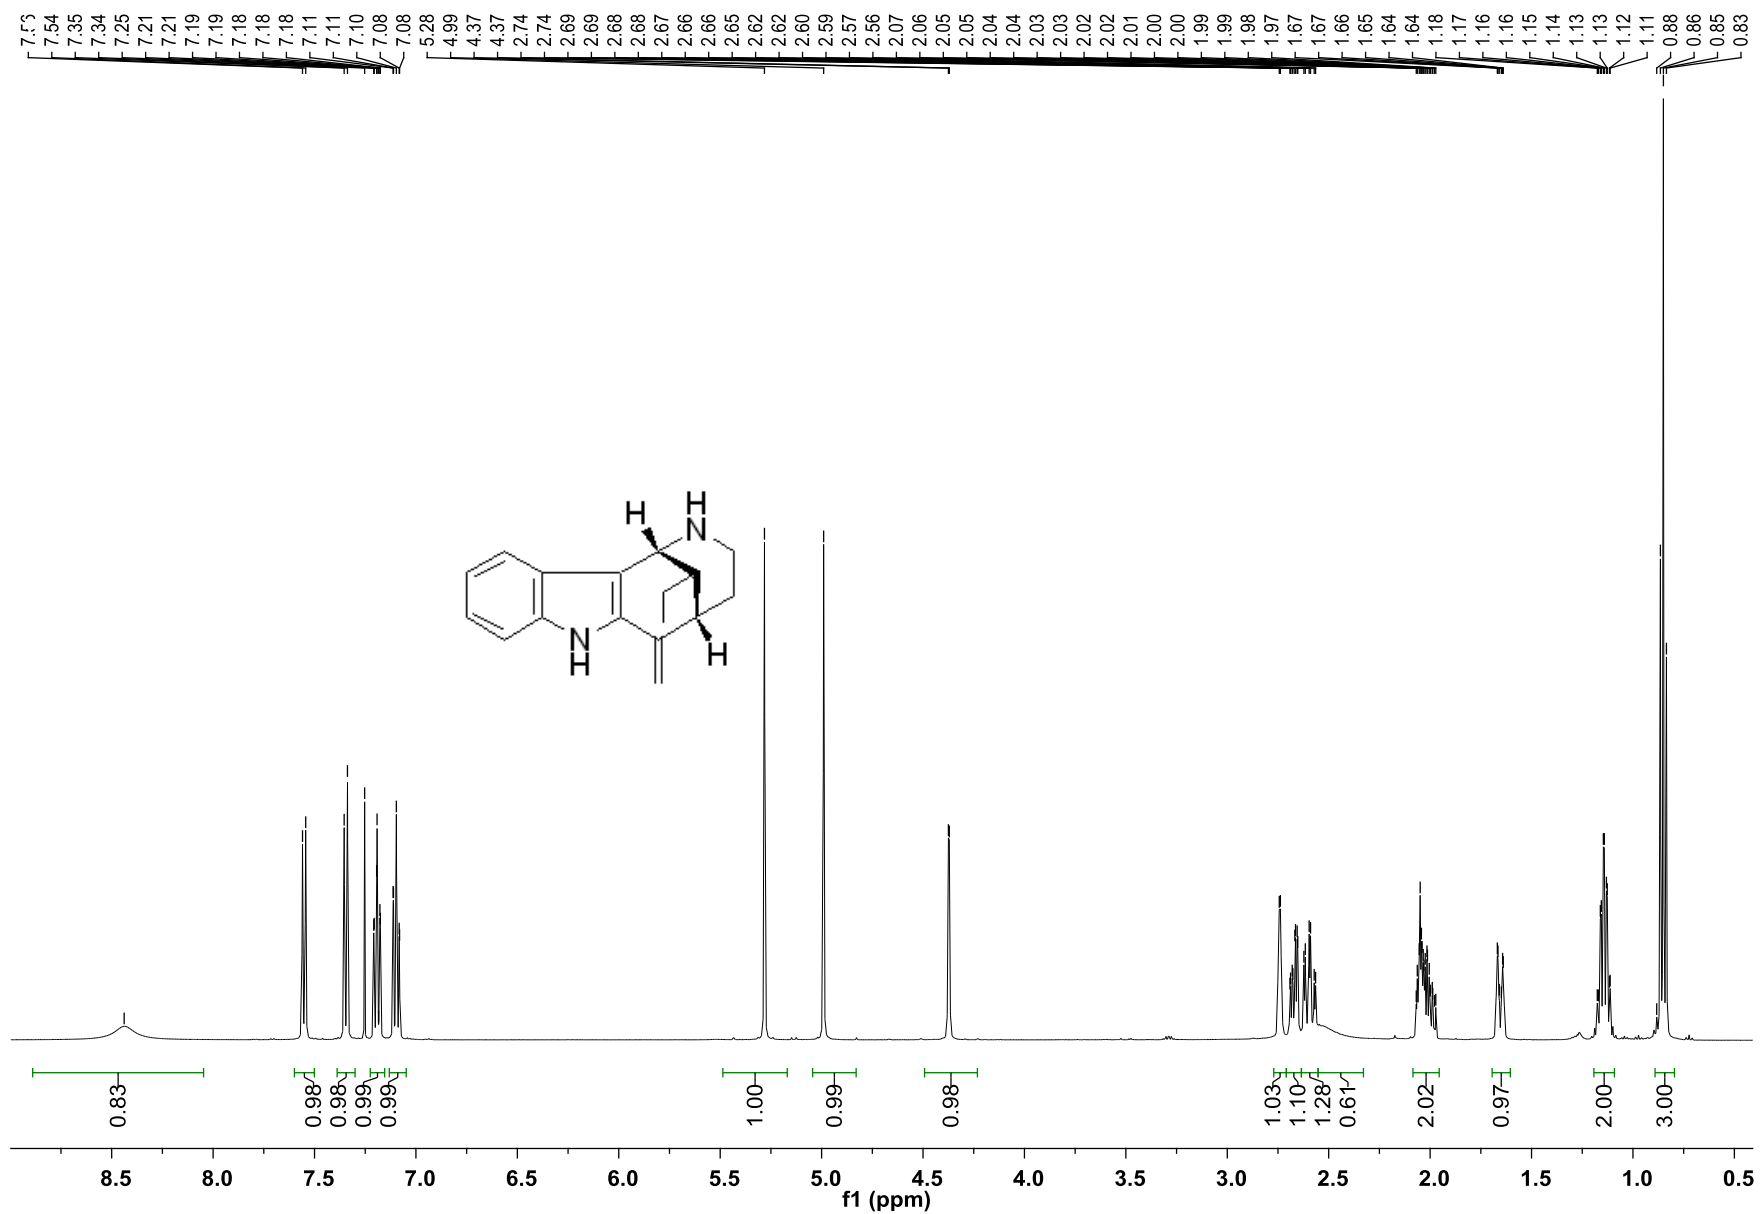

<sup>1</sup>H NMR Spectrum of Noruleine (500 MHz, CDCl<sub>3</sub>)



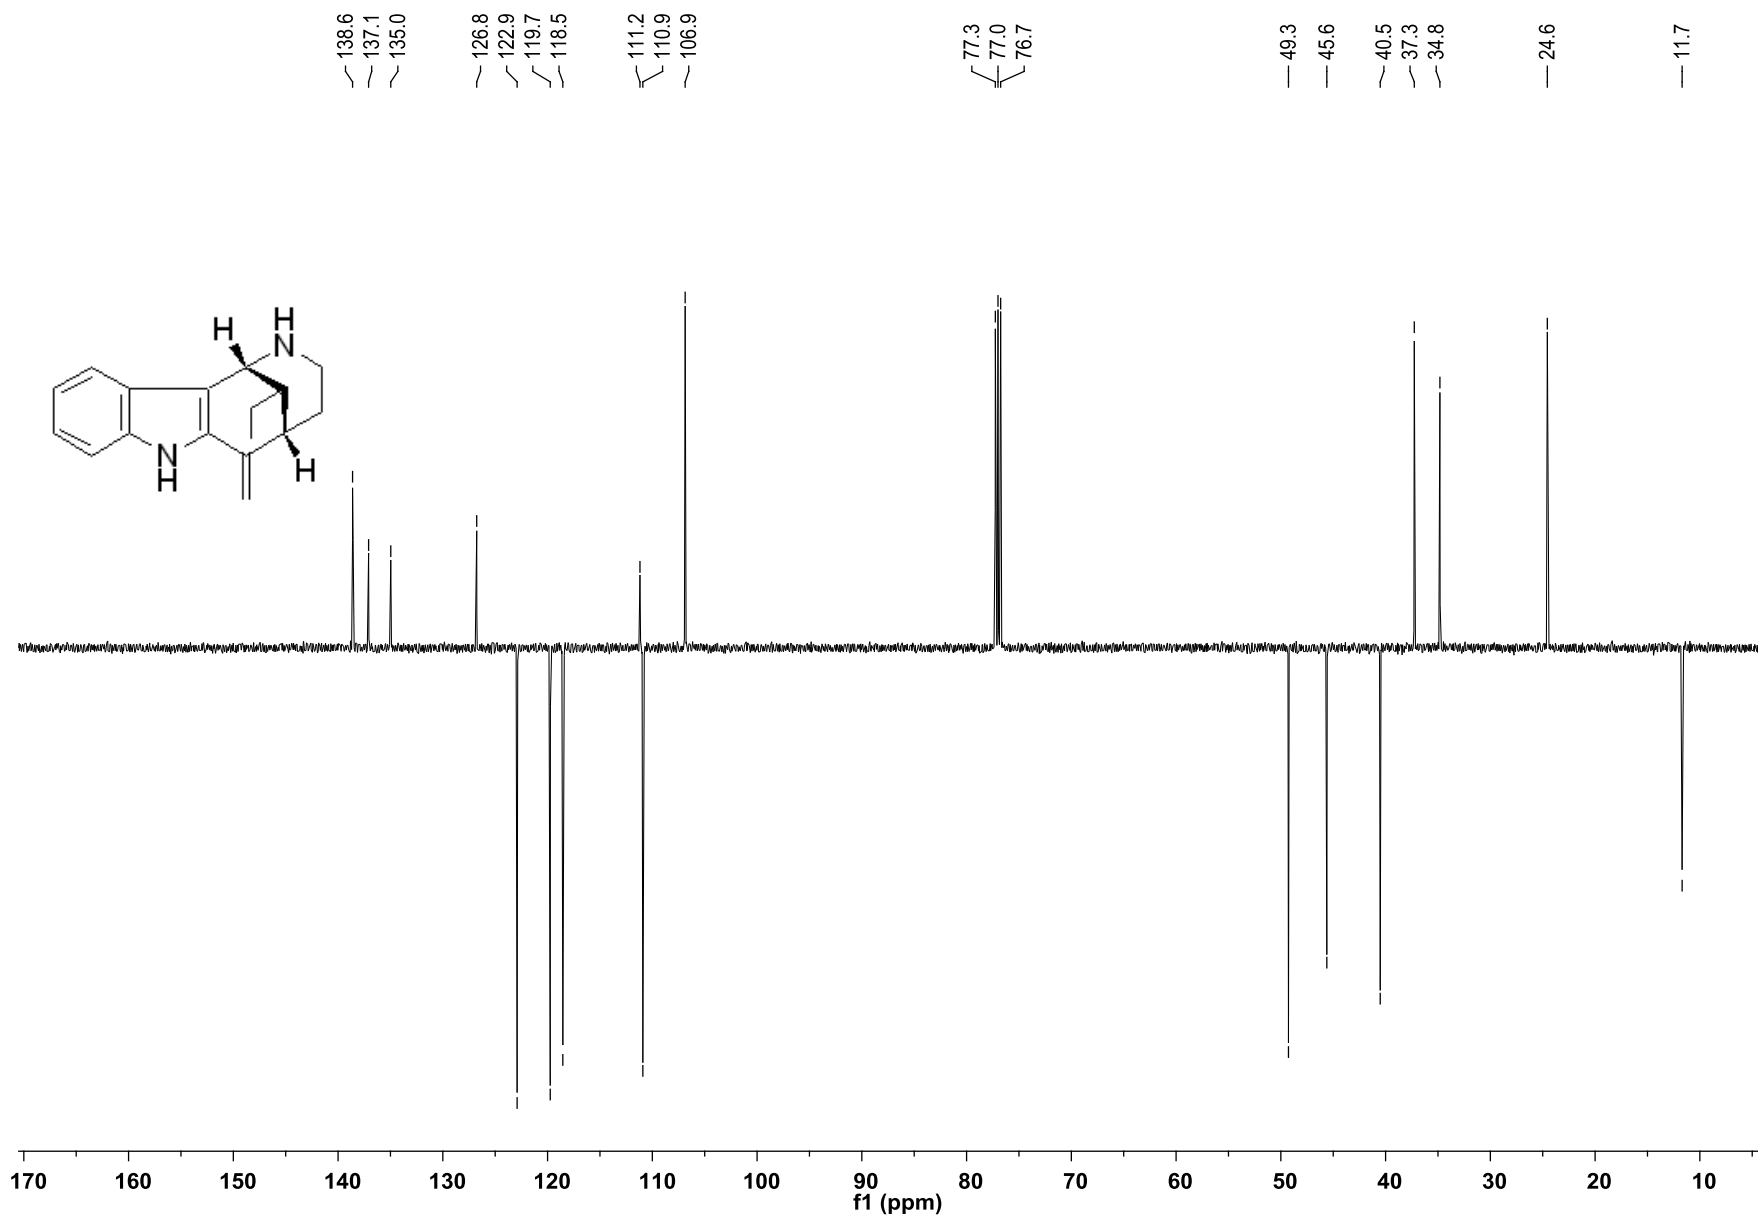

<sup>13</sup>C NMR Spectrum of Noruleine (APT, 125 MHz, CDCl<sub>3</sub>)

## Mass Spectrum SmartFormula Report

### Analysis Info

Analysis Name D:\Data\Erkan Erturk\SP-EE-Noruleine\_5.d  
 Method tune\_low.m  
 Sample Name  
 Comment

Acquisition Date 7/24/2012 2:40:34 PM  
 Operator BDAL@DE  
 Instrument / Ser# micrOTOF 10308

### Acquisition Parameter

|             |            |                      |          |                  |           |
|-------------|------------|----------------------|----------|------------------|-----------|
| Source Type | ESI        | Ion Polarity         | Positive | Set Nebulizer    | 0.4 Bar   |
| Focus       | Not active |                      |          | Set Dry Heater   | 180 °C    |
| Scan Begin  | 50 m/z     | Set Capillary        | 4500 V   | Set Dry Gas      | 4.0 l/min |
| Scan End    | 750 m/z    | Set End Plate Offset | -500 V   | Set Divert Valve | Waste     |

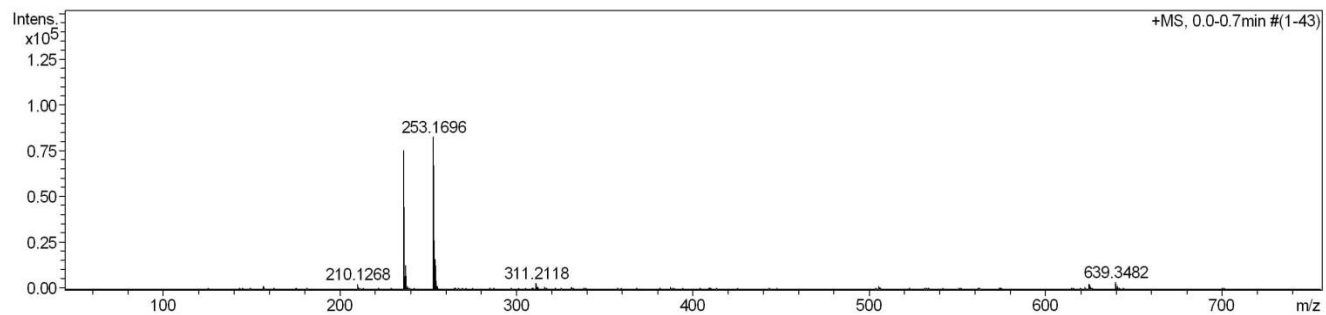

| Meas. m/z | # | Formula                                        | m/z      | err [ppm] | Mean err [ppm] | rdb | N-Rule | e <sup>-</sup> Conf | mSigma | Std I  | Std Mean m/z | Std I VarNorm | Std m/z Diff | Std Comb Dev |
|-----------|---|------------------------------------------------|----------|-----------|----------------|-----|--------|---------------------|--------|--------|--------------|---------------|--------------|--------------|
| 253.1696  | 1 | C <sub>17</sub> H <sub>21</sub> N <sub>2</sub> | 253.1699 | 1.5       | 1.8            | 8.5 | ok     | even                | 0.40   | 0.0006 | 0.0005       | 0.0003        | 0.0004       | 0.8427       |

## HRMS Spectrum of Noruleine (ESI+)

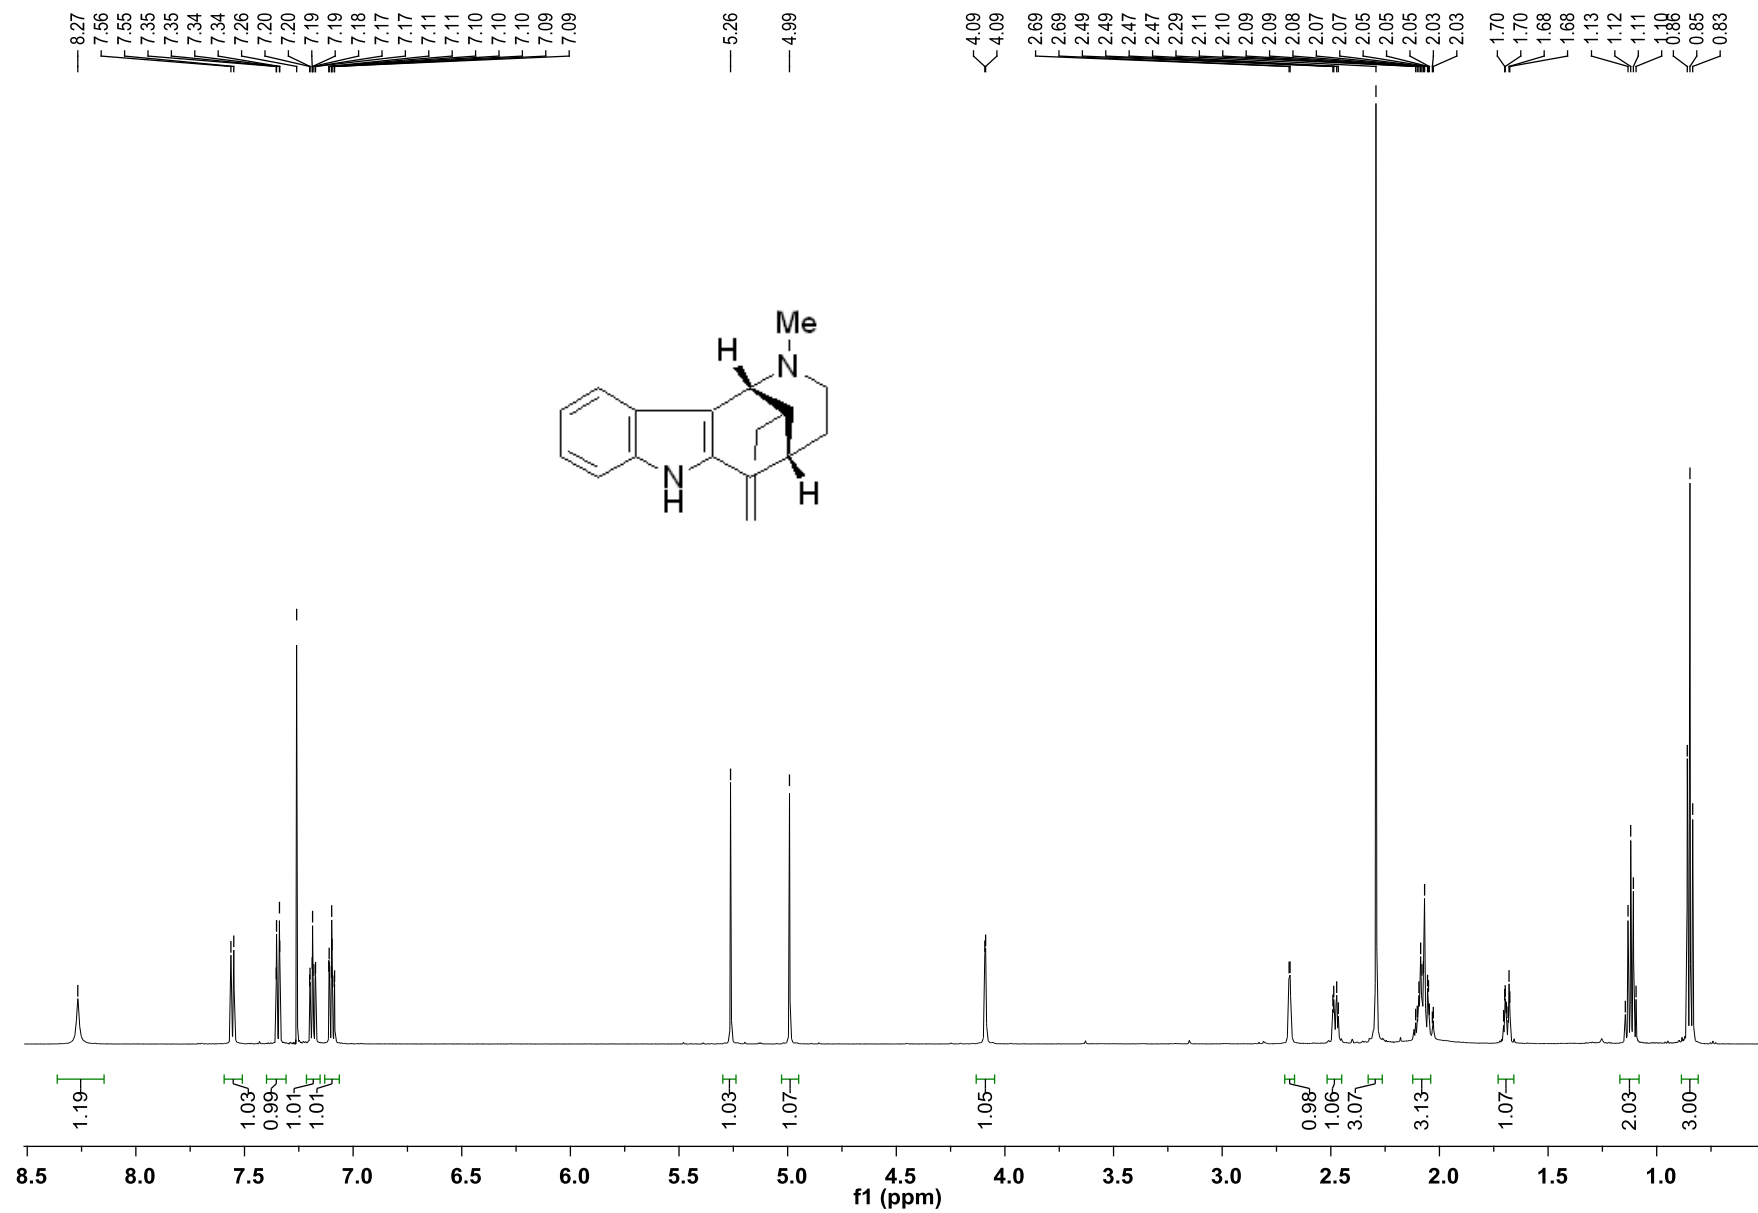

<sup>1</sup>H NMR Spectrum of Uleine (600 MHz, CDCl<sub>3</sub>)

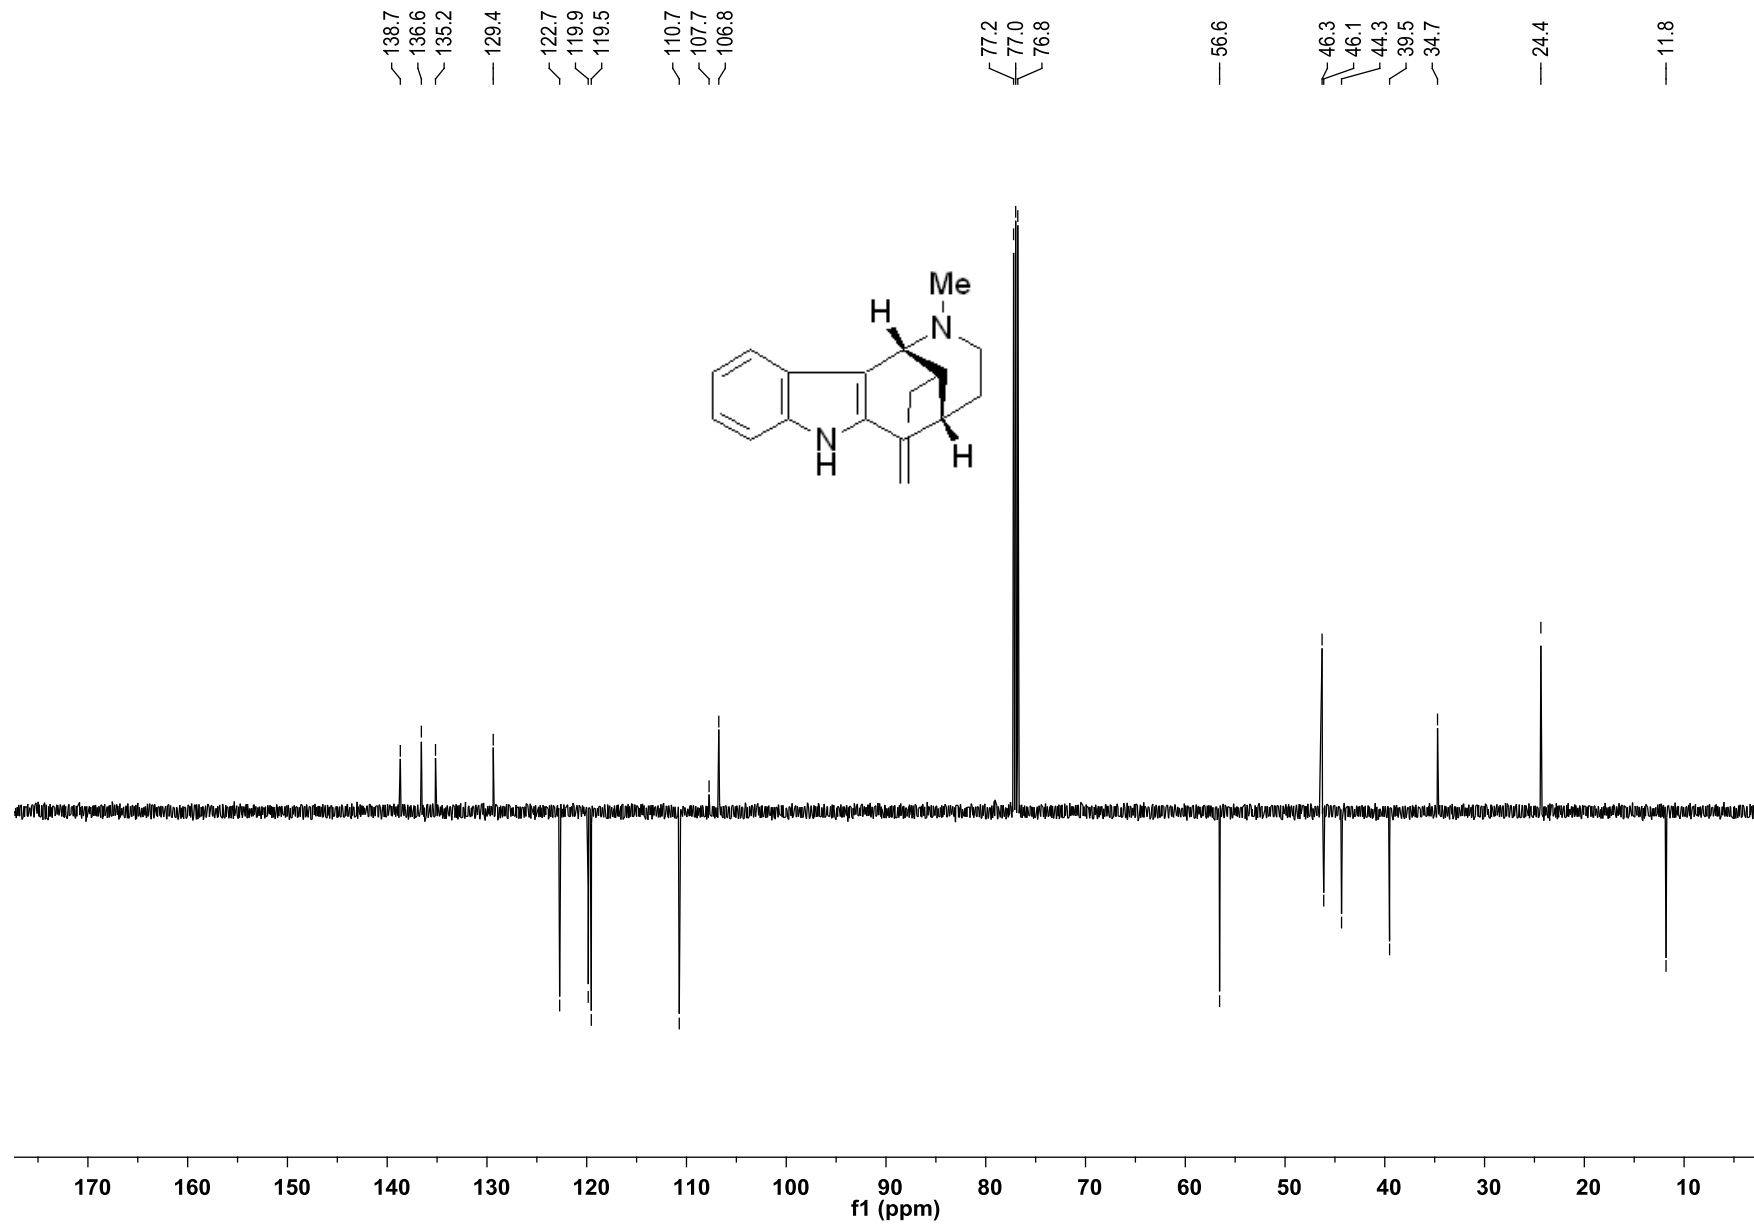

<sup>13</sup>C NMR Spectrum of Uleine (APT, 150 MHz, CDCl<sub>3</sub>)

### Mass Spectrum SmartFormula Report

**Analysis Info**

Analysis Name D:\Data\Erkan Erturk\SP-EE-Uleine\_7.d  
 Method tune\_low.m  
 Sample Name  
 Comment

Acquisition Date 7/24/2012 3:16:40 PM  
 Operator BDAL@DE  
 Instrument / Ser# micrOTOF 10308

**Acquisition Parameter**

|             |            |                      |          |                  |           |
|-------------|------------|----------------------|----------|------------------|-----------|
| Source Type | ESI        | Ion Polarity         | Positive | Set Nebulizer    | 0.4 Bar   |
| Focus       | Not active |                      |          | Set Dry Heater   | 180 °C    |
| Scan Begin  | 50 m/z     | Set Capillary        | 4500 V   | Set Dry Gas      | 4.0 l/min |
| Scan End    | 750 m/z    | Set End Plate Offset | -500 V   | Set Divert Valve | Waste     |

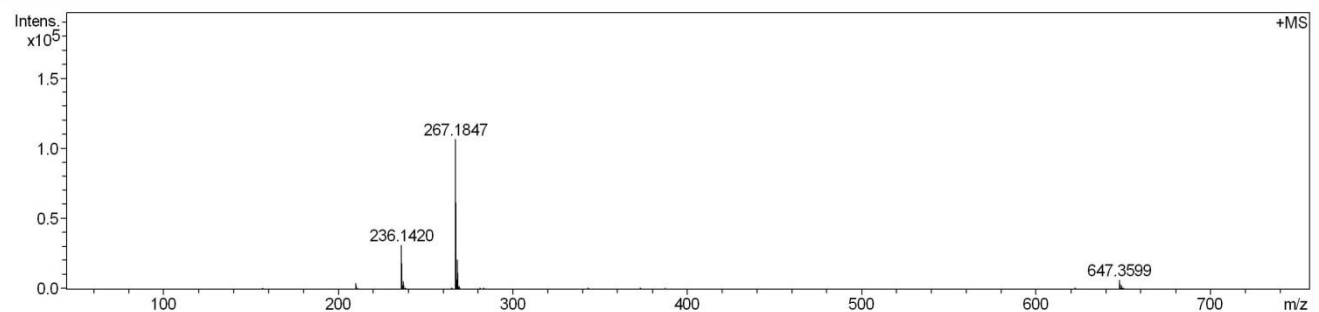

| Meas. m/z | # | Formula       | m/z      | err [ppm] | Mean err [ppm] | rdb | N-Rule | e <sup>-</sup> Conf | mSigma | Std I  | Std Mean m/z | Std I VarNorm | Std m/z Diff | Std Comb Dev |
|-----------|---|---------------|----------|-----------|----------------|-----|--------|---------------------|--------|--------|--------------|---------------|--------------|--------------|
| 267.1847  | 1 | C 18 H 23 N 2 | 267.1856 | 3.3       | 3.7            | 8.5 | ok     | even                | 4.03   | 0.0072 | 0.0012       | 0.0028        | 0.0001       | 0.8427       |

### HRMS Spectrum of Uleine (ESI+)
